1 **Phylo-taxonomgenomics of 182 strains of genus *Leuconostoc* elucidates its robust taxonomy and**  
2 **biotechnological importance**

3

4 Sanjeet Kumar<sup>1,2</sup>, Kanika Bansal<sup>3</sup>, Santosh Kumar Sethi<sup>1, \*</sup>, Birendra Kumar Bindhani<sup>2, \*</sup>

5 <sup>1</sup> School of Biotechnology, Gangadhar Mehar University, Sambalpur, India

6 <sup>2</sup> School of Biotechnology, Kalinga Institute of Industrial Technology, Bhubaneswar, India

7 <sup>3</sup> CSIR- Institute of Microbial Technology, Chandigarh, India

8 **Correspondence:**

9 Dr Birendra Kumar Bindhani

10 Associate professor

11 School of Biotechnology, Kalinga Institute of Industrial Technology (KiiT), Bhubaneswar, Odisha,  
12 India-751024

13 Email: [bkbindhani@kiitbiotech.ac.in](mailto:bkbindhani@kiitbiotech.ac.in)

14 Dr. Santosh Kumar Sethi

15 Assistant professor

16 School of Biotechnology, Gangadhar Mehar University, Sambalpur, Odisha India-768004

17 Email: [sksethi@gmuniversity.ac.in](mailto:sksethi@gmuniversity.ac.in)

18

19 **Abstract**

20 Genus *Leuconostoc* is a group of a diverse range of lactic acid bacteria (LAB) majorly found in dairy,  
21 food and environmental ecology. These microbes are commercially important for several industries  
22 due to their intrinsic genomic attributes such as bacteriocins, carbohydrate-active enzymes, plasmids  
23 etc. Even though the species of *Leuconostoc* are commercially significant, their taxonomy is largely  
24 based on old, low resolution traditional methods. There have been several taxonomic reclassifications  
25 in the past which are inadequate for microbiologist and food industry professionals to truly demarcate  
26 any new strain of genus *Leuconostoc*. The current taxonomy of the genus is largely based on classical  
27 approaches, which are in utmost need of reinvestigation by whole genome-based approaches. In the  
28 present study, the taxono-phylogenomic analysis clearly depicted sixteen species including three novel  
29 genomospecies in addition to several reshufflings across the species namely, *L. mesenteroides*, *L.*  
30 *pseudomesenteroides*, *L. gelidum* and *L. lactis*. The presence of a wide range of carbohydrate-active  
31 enzymes, type III polyketide synthase and vector plasmids suggested the biotechnological potential of

32 constituent strains of the genera. Further, the absence of antibiotic gene clusters reaffirms their utility  
33 in industries such as food and dairy. Such large-scale in-depth genome-based study can shed light on  
34 the nature of the genome dynamics of the species and help to obtain a more robust taxonomic  
35 classification.

36 **Keywords:** *Leuconostoc*, reclassification, taxonogenomic, phylogenomics, genomospecies,  
37 CAZymes, type III PKS.

### 38 **Abbreviations**

39 GH: Glycoside Hydrolase; CE: Carbohydrate Esterase; PL: Polysaccharide Lyase; GT:  
40 Glycosyltransferase; AA: Auxiliary Activities; CBM: Carbohydrate-Binding Module; ANI: Average  
41 Nucleotide Identity; dDDH: digital DNA-DNA hybridization; LAB: Lactic Acid Bacteria; Type III  
42 PKS: Type III polyketide synthase

### 43 **Introduction**

44 The genus *Leuconostoc* [1] belongs to the family *Leuconostocaceae* [2] which is one among the widely  
45 used group of lactic acid bacteria (LAB). *Leuconostoc* was first isolated by Cienkowski from a slime  
46 outbreak in a sugar factory in 1878 [3]. The isolate was named *Ascococcus mesenteroides* which  
47 produces dextran slime in sucrose solution [3, 4]. In 1911, an aroma bacteria "X" was isolated from a  
48 creamery starter which was later named *Leuconostoc* in 1930 [3, 5]. Historically, the taxonomy of  
49 *Leuconostoc* is a long tug of war across the several families of LAB. *Leuconostoc* sp. often occurs in  
50 similar habitats as *Lactobacillus* and *Lactococcus*, and was considered as an intermediate between  
51 *Streptococcus* and *Lactobacillus*. Genome based investigation of *Lactobacillaceae* and  
52 *Leuconostocaceae* suggests union of these two families [6]. In accordance with the latest standing in  
53 nomenclature of *Leuconostoc* (<https://lpsn.dsmz.de/genus/leuconostoc>), there are 16 valid species and  
54 along with 11 synonyms. Species of genus *Leuconostoc* are facultatively anaerobic, Gram-positive,  
55 nonmotile, catalase-negative, asporogenous, psychrotolerant or psychrotrophic bacteria with optimum  
56 growth temperature of 25-30 °C with an average GC content of 37.5% [2]. These are primarily  
57 associated with plant matter, fermenting vegetables, industries such as dairy, food and pharma etc. [4,  
58 7-10]. Few reports of their presence in chilled stored meats and human blood are a matter of concern  
59 [11, 12]. *Leuconostoc* have been known as a component of starter cultures in dairy since the 1920s,  
60 but its factual information about dairy is not very well documented [13]. These microbes are especially,  
61 known for their probiotic properties and ability to catalyse the production of several biotechnologically  
62 important products [14, 15]. *L. mesenteroides* is the type species of genus *Leuconostoc* [1] which is  
63 explored quite extensively in industries. *L. mesenteroides* species are used as a probiotic candidates  
64 which enables them to survive and grow under various stress conditions present in the gastrointestinal  
65 tract [16]. Species of *Leuconostoc* is an ideal fermenter of simple carbohydrates and have the capacity

66 to metabolize a wide range of carbohydrates, sugar alcohols and gluconate [17, 18]. Although the  
67 *Leuconostoc* sp. has been identified for safe use in the food industry and accorded "generally  
68 recognized as safe" (GRAS) status, there are several reports of its disease-causing nature [19, 20].  
69 Interestingly, the strains of *L. mesenteroides* follow dual lifestyles [16] causing disease in plants and  
70 humans [21-24].

71 Even though the species of the genus *Leuconostoc* are widely used for several purposes, the taxonomy  
72 is largely unexplored. All the earlier attempts to improve the taxonomy of genus *Leuconostoc* were  
73 based on limited phenotypic based methods or lower resolution phylogenetic approaches including  
74 housekeeping genes such as 16S rRNA, *rpoB*, *recA* gene etc. [25-28]. As these are based on very  
75 limited information, such methods do not provide a robust classification [29]. These studies largely  
76 lack a whole genome-based approach to obtain a robust taxonomic, identification of the key functional  
77 attributes across the several species of genus *Leuconostoc*. Although, there are some genome based  
78 study such as species of *Leuconostoc gasicomitatum* [30] was emended to *Leuconostoc gelidum* subsp.  
79 *gasicomitatum* [31]. Later *Leuconostoc mesenteroides* subsp. *suionicum* [32] was emended to  
80 *Leuconostoc suionicum* [33]. Most recently genome-based identification of *L. falkenbergense* sp. nov.  
81 [34] using whole genome-based sequence information from previously reported strains of *L.*  
82 *pseudomesenteroides*. Another recent study suggests the reclassification of *L. mesenteroides* MTCC  
83 10508 as a strain of *L. suionicum* [35]. All the studies Are focusing on limited strains from some  
84 species of *Leuconostoc* and not considering the whole genus *Leuconostoc*.

85 To obtain robust taxonomy of *Leuconostoc* sp., we reinvestigated and re-evaluated the phylogeny,  
86 genetic relatedness, and genomic determinants of the species within the present genus *Leuconostoc*  
87 (<https://lpsn.dsmz.de/genus/leuconostoc>). Implementation of these methods resulted in a robust  
88 taxonomic framework. We have identified three novel genomospecies namely, GS1 GS2 and GS3.  
89 We observed several large reclassifications across the strains of species *L. gelidum* subsp.  
90 *gasicomitatum*, *L. pseudomesenteroides*, *L. lactis* and *L. mesenteroides*. We have also identified  
91 species-specific unique genes in the pangenome of the genus *Leuconostoc*. We identified the presence  
92 of type III polyketide synthase system in all representative strains *Leuconostoc*, which signifies the  
93 antimicrobial ability against pathogenic bacteria. The abundance of the carbohydrate-active enzyme  
94 was also identified which includes majorly glycoside hydrolase and glycosyltransferase responsible  
95 for degradation, modification, and creation of glycosidic bonds. Furthermore, we believe such a large  
96 whole genome-based investigation can help in the estimation and evaluation of new potential strains  
97 or species belonging to the genus *Leuconostoc*. In recent days, the whole genome-based taxonomic  
98 evaluation became one of the most robust approaches [6]. Our investigation is an attempt to understand  
99 the genus *Leuconostoc* whose industrial importance is widely known but have underexplored  
100 taxonomic classification.

## 101 **Methods**

### 102 **Genome dataset procurement, initial QC and annotation**

103 All the genomes affiliated to genus *Leuconostoc* available in the public repository as of 31 March 2021  
104 were procured from NCBI (<https://www.ncbi.nlm.nih.gov/genome/?term=leuconostoc>) and  
105 EzBioCloud (<https://www.ezbiocloud.net/taxonomy>). Procured genomes were quality assessed using  
106 checkM v1.1.0 [36] with completeness and contamination bar of 95% and less than 3% respectively.  
107 There were altogether 183 including an outgroup genome resources were taken in the study (Table 1).  
108 Genome sequences for the type strains of the species *L. lactis* [25], *L. miyukkimchii* [37], *L. palmae* [38],  
109 were not included in the analyses due to the absence or poor-quality data in public databases. Also,  
110 synonym species/subspecies were strains of the *L. amelibiosum*, *L. argentinum*, *L. durionis*, *L.*  
111 *ficulneum*, *L. fructosum*, *L. oeni*, *L. paramesenteroides*, *P. pseudoficulneum* were not included due to  
112 their unavailability in the public repository. All the genomes were annotated using prokka v1.12 [39].

### 113 **Phylogenetic and Phylogenomic analysis**

114 16S rRNA gene predicted using barnap v0.8 (<https://github.com/tseemann/barnap>) was used to fetch  
115 16S rRNA gene sequences from all 183 genomes. Multiple sequence alignment of 16S rRNA was  
116 performed using clustalw [40]. A phylogenetic tree based on maximum likelihood (ML) was constructed  
117 using mega 7 [41] with a bootstrap replication of 1000. *Weissella viridescens* DSM 20410 was used as  
118 an outgroup. Whole genome-based phylogeny was implemented using PhyloPhlAn v3.0 [42] which  
119 used more than 400 most conserved genes across the strains under investigation. PhyloPhlAn uses  
120 usearch [43] for searching the gene cluster, muscle [44] for performing multiple sequence alignment  
121 and fasttree [45] for phylogenetic tree generation. A core genome-based tree was also generated using  
122 roary v3.1.2 [46] with 70% (inter-species similarity) cut off from the core genome alignment obtained  
123 with mafft [47]. All the phylogenetic tree generated was annotated using iTOL (<https://itol.embl.de/>)  
124 [48] for more lucid representation.

### 125 **Genome similarity assessment**

126 Genome similarity assessment was performed using several methods. Average nucleotide identity (ANI)  
127 was calculated using orthoANI v1.2 [49, 50] which uses usearch v8.1 [43] to find the orthologous cluster  
128 across the genomes for similarity comparison. A genome similarity assessment cut-off of 96% for  
129 orthoANI was used. Another tool fastANI v1.32 [51] (<https://github.com/ParBLiSS/FastANI>) was  
130 implemented to calculate nucleotide identity. fastANI uses a novel algorithm, which utilizes Mashmap  
131 with an intra and inter-species demarcation of >96% and <83% [52]. Digital DNA-DNA hybridization  
132 (dDDH) [53] was implemented using an online web portal of genome-to-genome distance calculator 2.1  
133 (GGDC) (<http://ggdc.dsmz.de/ggdc.php#>). Heatmap of the genome similarity assessment was generated  
134 using GENE-E (<https://software.broadinstitute.org/GENE-E/>).

## 135 **Pangenome and core genome assessment**

136 Pangenome analysis was implemented using roary v3.1.2 [46] with gff files obtained from prokka with  
137 blastp percentage identity of 85%. The flower plot indicates the core gene, unique gene and species  
138 specific to genes (Figure 3A). fasttree v2.1.10 [45] was implemented on the core gene alignment to  
139 obtain the core gene phylogeny. Core genome obtained was annotated with eggNOG-mapper [54]  
140 (<http://eggno-mapper.embl.de/>).

## 141 **Plasmid identification, antibiotic resistance and unique functional genomic attributes**

142 To obtain the presence of plasmid in the strains of genus *Leuconostoc*, abricate v1.0.1  
143 (<https://github.com/tseemann/abricate>) was implemented using plasmidFinder v2.1 database [55].  
144 Antibiotic resistance genes were also checked using the card module v3.08 [56], ResFinder v4.1 [57]  
145 and ARG-ANNOT [58] of abricate. Genomic attributes for the prediction of biosynthetic gene clusters  
146 were identified using antiSMASH v6 [59]. All the type strains and the novel genomospecies were  
147 checked for the presence of a biosynthetic gene cluster.

## 148 **Carbohydrate active enzyme analysis**

149 Carbohydrate-active enzymes (CAZy enzymes) (<http://www.cazy.org/>) among all the type strains and  
150 the novel genomospecies obtained from genome similarity analysis were identified using dbCAN2 [60].  
151 dbCAN2 scans the genome using Hidden Markov model (HMM) profile which uses HMMdb v7 [61]  
152 (e-value of  $< 1e-15$ , coverage  $> 0.35$ ), DIAMOND [62] (e-value  $< 1e-102$ ) and Hotpep [63] (frequency  
153  $> 2.6$ , hits  $> 6$ ) to improve the prediction. The genes were annotated by at least two of the methods were  
154 taken for further analysis. The detailed carbohydrate-active enzyme family information was obtained on  
155 the CAZyme (<http://www.cazy.org/>). Identified CAZymes were broadly classified as glycoside  
156 hydrolase (GHs), glycosyltransferases (GTs), carbohydrate esterases (CEs), carbohydrate-binding  
157 enzymes (CBM), auxiliary active enzymes (AAs), and polysaccharide lyases (PLs).

## 158 **Result and Discussion**

### 159 **Genomic features of the genus *Leuconostoc***

160 A total of 182 genomes of the genus *Leuconostoc* were used for the present study. Their average genome  
161 size ranged from 1 mb to 2.5 mb with an average GC content of 37%. The genomic attributes including  
162 #tRNA, #rRNA, #CDS etc. are summarized in table 1.

### 163 **Phylogenomics of the genus *Leuconostoc* reveals major phylogroups**

164 Due to high similarity 16S rRNA based phylogeny could not resolve the constituent species of the genus  
165 *Leuconostoc*. For instance, *L. inhae* and *L. gelidum* subsp. *gasicomitatum*; *L. rapi* and *L. kimchii*; *L.*  
166 *falkenbergense* and few strains of *L. pseudomesenteroides*; *L. mesenteroides*, *L. suionicum*, *L. litchi* and

167 *L. fallax* could not form distinct clade (Supplementary Figure 1). To get more accurate phylogeny, we  
168 obtained core genome-based phylogeny using roary and PhyloPhlAn (Figure 1, Supplementary Figure  
169 2). Both of these approaches resulted in major reshuffling across the *Leuconostoc* sp. Strains of major  
170 species of genus *Leuconostoc* namely, *L. mesenteroides*, *L. pseudomesenteroides*, *L. gelidum* and *L.*  
171 *lactis* were not forming species-specific clades. Rather, each of these four species were splitting into  
172 two distinct phylogroups.

173 Out of 76 strains of *L. mesenteroides* 74 formed a distinct phylogroup along with the *L. mesenteroides*  
174 subsp. *mesenteroides* ATCC8293<sup>T</sup> [1] confirming their species status. However, two of the remaining  
175 isolates namely, *L. mesenteroides* subsp. *mesenteroides* CBA3607 and *L. mesenteroides* CBA3628  
176 formed a distinct phylogroup. Similarly, out of 29 strains of *L. pseudomesenteroides* 4 strains including  
177 *L. pseudomesenteroides* LMG11482<sup>T</sup> [26] could be distinguished from the remaining 25 strains.  
178 Interestingly, these 25 strains of *L. pseudomesenteroides* formed a phylogroup with *L. falkenbergense*  
179 LMG10779<sup>T</sup> [34]. Further, out of 12 strains of *L. gelidum* only one strain *L. gelidum* subsp. *gelidum* JB7  
180 was forming phylogroup with *L. gelidum* subsp. *gelidum* KCTC3527<sup>T</sup> [64]. Whereas, remaining 10  
181 strains (*L. gelidum* subsp. *gasicomitatum*) were forming a phylogroup with the *L. inhae* KCTC3774<sup>T</sup>  
182 [65]. Similarly, 13 strains of *L. lactis* were also forming two distinct phylogroups comprising of 10 and  
183 3 strains respectively. However, due to the poor genome quality of the *L. lactis* type strain, we could not  
184 include in the present analysis. Overall, we could deduce 16 distinct phylogroups including 4 distinct  
185 unary strains which are representatives of previously described species namely, *L. fallax* ATCC700006<sup>T</sup>  
186 [66], *L. rapi* DSM27776<sup>T</sup> [27], *L. holzapfelii* CCUG54536<sup>T</sup> [67], *L. litchii* MB7<sup>T</sup> [67]

### 187 **Taxonogenomic assessment led to the identification of the novel genomospecies and reassignment** 188 **of strains**

189 Earlier taxonomic classification of species of *Leuconostoc* was mostly based on the classical taxonomy  
190 [1]. Description of the major species of genus *Leuconostoc* such as *L. mesenteroides* [1], *L. citreum* [26],  
191 *L. carnosum* [64], *L. inhae* [65] etc. was devoid of the whole genome-based approach such as ANI,  
192 dDDH and AAI etc., due to which, the current taxonomic classification of the *Leuconostoc* suggests  
193 them as a valid species (<https://lpsn.dsmz.de/genus/leuconostoc>). Robust phylogenomics of the genus  
194 *Leuconostoc* revealed several major reshufflings which need to be further confirmed by  
195 taxonogenomics.

196 Our whole genome-based taxonomic evidence using ANI (OrthoANI and fastANI) and dDDH  
197 correlated with the phylogenomics. For instance, three phylogroups consisting of earlier defined *L. lactis*  
198 and *L. mesenteroides* strains were found to be forming three novel genomospecies (GS1, GS2 and GS3)  
199 (Figure 2, Supplementary Figure 3). In addition to novel genomospecies, some of the previously defined  
200 strains of *L. pseudomesenteroides* and *L. gelidum* were identified as *L. falkenbergense* and *L. inhae*

201 respectively. The remaining species stands valid in accordance with the standing in nomenclature  
202 (<https://lpsn.dsmz.de/genus/leuconostoc>) (LPSN link, table 2).

### 203 **Pan genome-based identification of core genome and species-specific genes**

204 Pan-genome analysis using roary resulted in a comparatively small core genome (270 genes) and a large  
205 pan genome (22906 genes) which reveals a wide diversity of gene content within genus *Leuconostoc*.  
206 Here, we could get unique genes specific to the 16 species identified using taxonogenomics and  
207 phylogenomics (Figure 3A). *L. mesenteroides* (3822 genes) and *L. citreum* (2497 genes) largely  
208 contributed to the diversity of the pangenome. While, GS3 (134 genes), *L. suionicum* (148 genes) and  
209 *L. gelidum* (165 genes) had the least species-specific genes. Interestingly, amongst the unary species  
210 members, *L. fallax* showed the highest diversity with 1309 genes. The gene clusters obtained suggested  
211 a high number of accessory genes (shell and cloud) of 22,559 depicting a high degree of diversity across  
212 the species of genus *Leuconostoc*. Pan-genome matrix as well depicted the presence of species-specific  
213 genes (Figure 3C). Functional classification of the core genes suggested the majority of the information  
214 storage and processing (44%) and metabolism (32%) related genes (Figure 3B).

### 215 **Unique genomic attributes across spp. of *Leuconostoc*.**

216 High diversity in the genus *Leuconostoc* is evident from the gene content analysis. On the contrary, they  
217 were found to harbour pLCK4 (12183 bp) and LkipL4719 (21924 bp) plasmids in 97 and 86 genomes  
218 respectively. Plasmid pLCK4 was originally derived from *L. citreum* KM20 [68], which is one among  
219 the four high copy number plasmids of *L. citreum* KM 20 [68]. Plasmid pLCK4 which is considered to  
220 be a part of pMBLT00 [69], is considered to be a shuttle vector for inducing overproduction of D-lactate  
221 in *Leuconostoc* and *Lactococcus lactis* strains [69]. LkipL4719 is first reported in the *Leuconostoc*  
222 *kimchii* IMSNU 11154 [70] which harbours several metal transport gene families, suggesting its intrinsic  
223 nature across the species of *Leuconostoc* [70]. Additionally, 8 different plasmids namely pKLC4  
224 (36602) in 11 genomes, pIGMS32 (or ColRNAI\_1) (9294 bp) in 6 genome, pJB01 (2235 bp) in genome  
225 and pLFE1 (4031 bp) in 2 genomes. Whereas plasmid pYSI8 (4973 bp), pMG828-1 (Col(MG828)\_1)  
226 (1902 bp), pJE1 (5149 bp) and pBI143 (2747 bp) are present in one genome each (Figure 1). In addition  
227 to low diversity in the plasmid, antibiotic resistance genes were also present but only in 4 genomes out  
228 of 182 *Leuconostoc* strains analysed using CARD, resfinder and arg-annot database integrated in  
229 abricate (supplementary table 2). However, genomic analysis of the *Leuconostoc* human pathogens is  
230 limited due to a lack of genomic resources.

231 Whereas, we found Type III polyketide synthase (PKSs) in all the type strains of 16 species identified  
232 (Figure 4 A). Type III polyketide synthase (PKSs) are homodimers of ketosynthase which catalyze the  
233 condensation of one or several molecules of extender substrate onto a starter substrate through an  
234 iterative decarboxylative Claisen condensation reactions [71, 72]. Microbial type III PKSs seem to use  
235 an acyl–acyl carrier protein (ACP) as a starter substrate, [73], and in some cases, type III PKS genes

236 form a cluster with ACP or fatty acid biosynthetic genes [74, 75]. Future studies on type III PKSs will  
237 provide important insights into the properties of these enzymes and their role in the biosynthesis of  
238 natural products. Moreover, strains of genus *Leuconostoc* is reported to harbour several bacteriocins  
239 belonging to class IIa bacteriocins, leucocin H, mesentericin etc. [76-79] imparting antimicrobial  
240 activity against foodborne pathogens [80]. In-depth genomic investigation of bacteriocins and  
241 antimicrobial peptides are the need of the hour to explore the potential of the species of genus  
242 *Leuconostoc*.

### 243 **Carbohydrate-Active Enzyme (CAZymes)**

244 Among type strains of 16 phylogroups identified using genome similarity and phylogenomic assessment  
245 reveals the presence of CAZyme groups of GH, GT, CR, AA, CBM and PL using dbCAB2. These  
246 CAZymes groups are the enzymes involved in the degradation, modification, and creation of glycosidic  
247 bonds. Altogether 1344 protein-coding genes were detected by one of three methods namely hotpep,  
248 Diamond and HMMER (Figure 4 B). We found all the major CAZyme groups distributed across the  
249 strains represented with a heatmap (Figure 4 B) reveals the differential presence of all the classes of  
250 CAZyme in the strains of *Leuconostoc*. Most of the identified gene clusters were distributed across GH  
251 (52%), GT (40%), CE (4.75%), CMB (2.2%) and PL (1%) families. (Summarized in supplementary table  
252 1). We found diverse GHs namely GH13 (7.07%), GH70 (5.49%), GH73 (5.38%), GH1 (5.12%), GH  
253 32 (4.85%), GH25 (4.54%), GH65 (2.95%) across *Leuconostoc* sp. GHs catalyse the cleavage of O-  
254 glycosidic bonds linking the carbohydrate moieties or carbohydrate and non-carbohydrate moieties.  
255 GH13 family of CAZymes reveals the presence of amylases, beta-glucosidases, beta-xylosidases, beta-  
256 galactosidase gene cluster across the species of *Leuconostoc*. Similarly, the GH70 family includes  
257 transglucosylases which catalyse the intra- or intermolecular replacement of glycoside molecules at the  
258 anomeric position, giving rise to new glycoside molecules, such as oligosaccharides [81]. GH73 family  
259 includes N-acetylmuramidase which cleaves the  $\beta$ -1,4-glycosidic bond between the N-  
260 acetylglucosaminyl (GlcNAc) and N-acetylmuramyl (MurNAc) moieties in bacterial peptidoglycan  
261 [82]. Glycosyl transferases are primarily involved in the formation of glycosidic bonds by transfer of  
262 sugar moiety from the activated sugar donor to the acceptor molecule. We identified three major GTs  
263 namely GT4 (13.5%), GT2 (12.6%) and GT51 (4.3%). GT4 a glycosyltransferase family 4 protein is  
264 responsible for accessory Sec system glycosyltransferase GtfA. GT2 glycosyltransferase family 2  
265 protein is responsible for undecaprenyl-diphospho-muramoyl pentapeptide and beta-N-  
266 acetylglucosaminyltransferase and putative glycosyltransferase, exosortase G system-associated. GT51  
267 is responsible for PBP1A family penicillin-binding protein and murein polymerases. These are majorly  
268 involved in the synthesis of the peptidoglycan cell wall and play crucial roles in maintaining the integrity  
269 of the cell wall [83]. Likewise, CAZymes present under CE, CBM and PL categories are CE9 (2.11%),  
270 CE1 (2.1%), CBM50 (1.79%) and PL1 (1%).



## 271 Conclusion

272 Several taxonomic reclassifications were found by the present study inferring the true phylogenetic  
273 positioning of the strains of genus *Leuconostoc* (Table 2). True phylogeny will help future research to  
274 better identify and reclassify the strains of the genus belonging to biotechnologically important genera.  
275 In-depth genomic investigations of the strains suggest the presence of several determinants such as  
276 plasmid and type III PKS system etc. and the absence of antibiotic gene cluster also approves GRAS  
277 status. However, minor reports of *Leuconostoc* strains as human pathogens have raised concerns about  
278 their biotechnological implications. The present phylo-taxonomomic study provides a robust  
279 taxonomic framework of the genus which will be valuable in the identification of these clinically  
280 relevant strains. Such future genomic investigations of strains from diverse niches including nosocomial,  
281 environment, food and industry will shed light on their niche-specific attributes. This will be critical in  
282 surveillance to demarcate safe to use strains for food and industry from their pathogenic counterparts.  
283 Thus, our work is expected to promote research on the biotechnological important genus which is long  
284 overlooked and to better understand the intrinsic property of these important microbes.

## 285 Figure and table legends

286 **Figure 1: Whole genome-based core genome phylogenomic tree obtained using roary:** Phylogenetic  
287 tree was obtained using fasttree on the core gene alignment using mafft in roary run. For circular  
288 representation iTOL was used and labelled in accordance to the species group. Bootstrap values are  
289 represented with blue dots. *Weissella viridescens* DSM 20410 was used as an outgroup. Genomospecies  
290 1, genomospecies 2 and genomospecies 3 represent the novel group of bacteria within the genus  
291 *Leuconostoc*. The plasmid was labelled in the genome with coloured dots at the circumference.

292 **Figure 2: Whole genome-based similarity assessment using OrthoANI and dDDH.** A). All is to all  
293 ANI similarity heatmap showing separate groups obtained by using a cut-off of 96%. B). Heatmap of  
294 digital DNA-DNA hybridization all across the type strains with the cut-off of 70% genome similarity.

295 **Figure 3: Pan-genome analysis:** A). Pan-genome representation of all the gene clusters obtained from  
296 roary (22906). Core gene (270), and species-specific genes (unique gene) along with the number of  
297 strains in the group is marked in each group of genera *Leuconostoc*. B) Distribution of COG-based  
298 functional categories of core genes of the *Leuconostoc* genus. Here, the x-axis represents the number of  
299 genes and y-axis represents the functional categories. The count of gene cluster is indicated across  
300 classes in the box plot. C). Pan-genome plot representing the gene presence-absence across the strains.  
301 Core genome phylogroups are represented in the left isolates.

302 **Figure 4: Type III PKS and CAZymes:** A). The presence of type III PKS gene cluster was present in  
303 all the type strains in the study. The presence of the core biosynthetic gene in almost all the type strains  
304 was identified. Other genes such as additional biosynthetic genes, transporter genes etc. were also

305 identified. B). Heatmap showing all the different classes of the carbohydrate-active enzyme classified  
306 under GH: Glycoside Hydrolase; CE: Carbohydrate Esterase; PL: Polysaccharide Lyase; GT:  
307 Glycosyltransferase; AA: Auxiliary Activities; CBM: Carbohydrate-Binding Module. Venn diagram  
308 revealing carbohydrate-active enzyme identified by three different approaches of HMMER, diamond  
309 and hotpep. Heatmap was generated based on the presence of the carbohydrate-active enzyme by at least  
310 two approaches.

311 **Supplementary Figure 1: 16S rRNA tree:** A phylogenetic tree based on ML-based obtained by 16S  
312 rRNA gene sequences of all the strains under study. Bootstrap values are represented by blue dots. Strain  
313 name of some of the complete genome which resulted in multiple copies of 16S rRNA were appended  
314 with 1, 2, 3 etc.

315 **Supplementary Figure 2: Phylogenetic tree obtained using PhyloPhlAn:** A phylogenetic tree based  
316 on more than 400 conserved genes. Bootstrap values are marked with blue dots.

317 **Supplementary Figure 3: fastANI:** Heatmap obtained using genome similarity matrix obtained using  
318 fastANI.

319 **Table 1:** Metadata of the strains used in the study. A detailed description of all the strains used in the  
320 study along with the assembly statistics such as assembly size, %GC content, number of CDS, etc.  
321 general identification of the strains such as strain Id, NCBI accession number and source etc. are also  
322 summarized.

323 **Table:2:** A descriptive list of the earlier classification and robust reclassification of the strain based on  
324 this study.

325 **Supplementary Table 1:** A descriptive list of antibiotic resistance genes predicted using several  
326 databases such as using CARD, resfinder and arg-annot.

327 **Supplementary Table 2:** A descriptive list of CAZyme identified using dbCAN2.

## 328 References

- 329 1. Van Tiegham, P.J.A.d.s.n.B.B., *Sur la gomme de sucrerie*. Annales des sciences naturelles.  
330 Botanique. Botanique, 1878. **6**(7): p. 180.
- 331 2. Schleifer, K.H.J.B.s.M.o.S.o.A. and Bacteria, *Leuconostocaceae fam. nov.* 2015: p. 1-1.
- 332 3. Hucker, G. and C.S.J.B. Pederson, *Studies on the Coccaceae XVI. The genus Leuconostoc.*  
333 *Tech.* 1930. **167**.
- 334 4. Devoyod, J. and F.J.L.I. Poullain, *Les Leuconostocs. Propriétés: leur rôle en technologie*  
335 *laitière*. 1988. **68**(3): p. 249-279.
- 336 5. Lundstedt, E.J.C.D.P.J., *Some reflections on the development of starters for the cultured dairy*  
337 *products industry [in USA and Europe]*. 1983.
- 338 6. Zheng, J., et al., *A taxonomic note on the genus Lactobacillus: Description of 23 novel genera,*  
339 *emended description of the genus Lactobacillus Beijerinck 1901, and union of*  
340 *Lactobacillaceae and Leuconostocaceae*. International journal of systematic evolutionary  
341 microbiology, 2020. **70**(4): p. 2782-2858.
- 342 7. Cogan, T. and S.J.T.I.m.p. Gilliland, *In Bacterial Starter Cultures for Foods*. 1985, CRC Press  
343 Boca Raton, FL. p. 25-40.
- 344 8. Kekkonen, R.A., et al., *Probiotic Leuconostoc mesenteroides ssp. cremoris and Streptococcus*  
345 *thermophilus induce IL-12 and IFN- $\gamma$  production*. 2008. **14**(8): p. 1192.
- 346 9. Ogier, J.-C., et al., *Safety assessment of dairy microorganisms: the Leuconostoc genus.*  
347 International journal of food microbiology, 2008. **126**(3): p. 286-290.
- 348 10. Duan, P., et al., *Whole-cell biosynthesis of 2-O- $\alpha$ -D-glu-copyranosyl-sn-glycerol by*  
349 *recombinant Bacillus subtilis*. 2020. **36**(9): p. 1918-1928.
- 350 11. Borch, E., M.-L. Kant-Muermans, and Y.J.I.j.o.f.m. Blixt, *Bacterial spoilage of meat and cured*  
351 *meat products*. 1996. **33**(1): p. 103-120.
- 352 12. Handwerger, S., et al., *Infection due to Leuconostoc species: six cases and review*. 1990.  
353 **12**(4): p. 602-610.
- 354 13. Thunell, R.J.J.o.d.s., *Taxonomy of the Leuconostocs*. 1995. **78**(11): p. 2514-2522.
- 355 14. Saravanan, C., et al., *Production, partial characterization and antioxidant properties of*  
356 *exopolysaccharide  $\alpha$ -D-glucan produced by Leuconostoc lactis KC117496 isolated from an idli*  
357 *batter*. 2019. **56**(1): p. 159-166.
- 358 15. Abid, Y., et al., *Rheological and emulsifying properties of an exopolysaccharide produced by*  
359 *potential probiotic Leuconostoc citreum-BMS strain*. 2021. **256**: p. 117523.
- 360 16. de Paula, A.T., et al., *The two faces of Leuconostoc mesenteroides in food systems*. 2015.  
361 **31**(2): p. 147-171.
- 362 17. Lonvaud-Funel, A.J.L.a.b.G., *metabolism and applications, Lactic acid bacteria in the quality*  
363 *improvement and depreciation of wine*. 1999: p. 317-331.
- 364 18. Kandler, O.J.A.v.L., *Carbohydrate metabolism in lactic acid bacteria*. 1983. **49**(3): p. 209-224.
- 365 19. Cappelli, E.A., et al., *Leuconostoc pseudomesenteroides as a cause of nosocomial urinary*  
366 *tract infections*. 1999. **37**(12): p. 4124-4126.
- 367 20. Franco-Cendejas, R., et al., *Leuconostoc mesenteroides periprosthetic knee infection, an*  
368 *unusual fastidious Gram-positive bacteria: a case report*. BMC infectious diseases, 2017.  
369 **17**(1): p. 1-5.
- 370 21. Friedland, I., M. Snipelisky, and M.J.J.o.c.m. Khoosal, *Meningitis in a neonate caused by*  
371 *Leuconostoc sp.* 1990. **28**(9): p. 2125-2126.
- 372 22. Conn, K., et al., *Leuconostoc mesenteroides subsp. mesenteroides, the first report of a*  
373 *coccoid bacterium causing a plant disease*. 1995. **85**(5): p. 593-599.
- 374 23. Khudaier, B.Y.J.J.o.T.-Q.U.n.V., *Leuconostoc mesenteroides cause Nosocomial UTI At a*  
375 *tertiary care center in North India*. 2011.
- 376 24. Lee, M.-R., et al., *Healthcare-associated bacteraemia caused by Leuconostoc species at a*  
377 *university hospital in Taiwan between 1995 and 2008*. 2011. **78**(1): p. 45-49.
- 378 25. Garvie, E.I.J.J.o.D.R., *The genus Leuconostoc and its nomenclature*. 1960. **27**(2): p. 283-292.

- 379 26. FARROW, J.A., et al., *Nucleic acid homologies of some vancomycin-resistant leuconostocs*  
380 *and description of Leuconostoc citreum sp. nov. and Leuconostoc pseudomesenteroides sp.*  
381 *nov.* 1989. **39**(3): p. 279-283.
- 382 27. Lyhs, U., et al., *Leuconostoc rapi sp. nov., isolated from sous-vide-cooked rutabaga.* 2015.  
383 **65**(8): p. 2586-2590.
- 384 28. Ricciardi, A., et al., *Analysis of rpoB polymorphism and PCR-based approaches for the*  
385 *identification of Leuconostoc mesenteroides at the species and subspecies level.* 2020. **318**: p.  
386 108474.
- 387 29. Chun, J., et al., *Proposed minimal standards for the use of genome data for the taxonomy of*  
388 *prokaryotes.* International journal of systematic evolutionary microbiology, 2018. **68**(1): p.  
389 461-466.
- 390 30. Björkroth, K.J., et al., *Characterization of Leuconostoc gasicomitatum sp. nov., associated*  
391 *with spoiled raw tomato-marinated broiler meat strips packaged under modified-*  
392 *atmosphere conditions.* 2000. **66**(9): p. 3764-3772.
- 393 31. Rahkila, R., et al., *Reclassification of Leuconostoc gasicomitatum as Leuconostoc gelidum*  
394 *subsp. gasicomitatum comb. nov., description of Leuconostoc gelidum subsp. aenigmaticum*  
395 *subsp. nov., designation of Leuconostoc gelidum subsp. gelidum subsp. nov. and emended*  
396 *description of Leuconostoc gelidum.* 2014. **64**(4): p. 1290-1295.
- 397 32. Gu, C.T., et al., *Leuconostoc mesenteroides subsp. suionicum subsp. nov.* 2012. **62**(7): p.  
398 1548-1551.
- 399 33. Jeon, H.H., et al., *A proposal of Leuconostoc mesenteroides subsp. jongsajibkimchii subsp.*  
400 *nov. and reclassification of Leuconostoc mesenteroides subsp. suionicum (Gu et al., 2012) as*  
401 *Leuconostoc suionicum sp. nov. based on complete genome sequences.* 2017. **67**(7): p. 2225-  
402 2230.
- 403 34. Wu, Y. and C.T. Gu, *Leuconostoc falkenbergense sp. nov., isolated from a lactic culture,*  
404 *fermentating string beans and traditional yogurt.* International Journal of Systematic  
405 Evolutionary Microbiology, 2021. **71**(1): p. 004602.
- 406 35. Kaushal, G. and S.P.J.G. Singh, *Comparative genome analysis provides shreds of molecular*  
407 *evidence for reclassification of Leuconostoc mesenteroides MTCC 10508 as a strain of Leu.*  
408 *suionicum.* 2020. **112**(6): p. 4023-4031.
- 409 36. Parks, D.H., et al., *CheckM: assessing the quality of microbial genomes recovered from*  
410 *isolates, single cells, and metagenomes.* 2015. **25**(7): p. 1043-1055.
- 411 37. Lee, S.H., et al., *Leuconostoc miyukkimchii sp. nov., isolated from brown algae (Undaria*  
412 *pinnatifida) kimchi.* 2012. **62**(Pt\_5): p. 1098-1103.
- 413 38. Ehrmann, M.A., et al., *Leuconostoc palmae sp. nov., a novel lactic acid bacterium isolated*  
414 *from palm wine.* 2009. **59**(5): p. 943-947.
- 415 39. Seemann, T., *Prokka: rapid prokaryotic genome annotation.* Bioinformatics, 2014. **30**(14): p.  
416 2068-2069.
- 417 40. Thompson, J.D., D.G. Higgins, and T.J. Gibson, *CLUSTAL W: improving the sensitivity of*  
418 *progressive multiple sequence alignment through sequence weighting, position-specific gap*  
419 *penalties and weight matrix choice.* Nucleic acids research, 1994. **22**(22): p. 4673-4680.
- 420 41. Kumar, S., G. Stecher, and K. Tamura, *MEGA7: Molecular Evolutionary Genetics Analysis*  
421 *version 7.0 for bigger datasets.* Mol Biol Evol, 2016: p. msw054.
- 422 42. Asnicar, F., et al., *Precise phylogenetic analysis of microbial isolates and genomes from*  
423 *metagenomes using PhyloPhlAn 3.0.* 2020. **11**(1): p. 1-10.
- 424 43. Edgar, R.C., *Search and clustering orders of magnitude faster than BLAST.* Bioinformatics,  
425 2010. **26**(19): p. 2460-2461.
- 426 44. Edgar, R.C.J.N.a.r., *MUSCLE: multiple sequence alignment with high accuracy and high*  
427 *throughput.* 2004. **32**(5): p. 1792-1797.
- 428 45. Price, M.N., P.S. Dehal, and A.P.J.P.o. Arkin, *FastTree 2—approximately maximum-likelihood*  
429 *trees for large alignments.* 2010. **5**(3): p. e9490.

- 430 46. Page, A.J., et al., *Roary: rapid large-scale prokaryote pan genome analysis*. *Bioinformatics*,  
431 2015. **31**(22): p. 3691-3693.
- 432 47. Katoh, K., J. Rozewicki, and K.D.J.B.i.b. Yamada, *MAFFT online service: multiple sequence*  
433 *alignment, interactive sequence choice and visualization*. 2019. **20**(4): p. 1160-1166.
- 434 48. Letunic, I. and P.J.N.a.r. Bork, *Interactive Tree Of Life (iTOL) v4: recent updates and new*  
435 *developments*. 2019. **47**(W1): p. W256-W259.
- 436 49. Yoon, S.-H., et al., *A large-scale evaluation of algorithms to calculate average nucleotide*  
437 *identity*. 2017. **110**(10): p. 1281-1286.
- 438 50. Lee, I., et al., *OrthoANI: an improved algorithm and software for calculating average*  
439 *nucleotide identity*. *International journal of systematic and evolutionary microbiology*, 2016.  
440 **66**(2): p. 1100-1103.
- 441 51. Jain, C., et al., *High throughput ANI analysis of 90K prokaryotic genomes reveals clear species*  
442 *boundaries*. 2018. **9**(1): p. 1-8.
- 443 52. Jain, C., et al. *A fast approximate algorithm for mapping long reads to large reference*  
444 *databases*. in *International Conference on Research in Computational Molecular Biology*.  
445 2017. Springer.
- 446 53. Auch, A.F., et al., *Digital DNA-DNA hybridization for microbial species delineation by means*  
447 *of genome-to-genome sequence comparison*. *Standards in genomic sciences*, 2010. **2**(1): p.  
448 117-134.
- 449 54. Huerta-Cepas, J., et al., *Fast genome-wide functional annotation through orthology*  
450 *assignment by eggNOG-mapper*. *Molecular biology and evolution*, 2017. **34**(8): p. 2115-  
451 2122.
- 452 55. Carattoli, A., et al., *In silico detection and typing of plasmids using PlasmidFinder and plasmid*  
453 *multilocus sequence typing*. 2014. **58**(7): p. 3895-3903.
- 454 56. Jia, B., et al., *CARD 2017: expansion and model-centric curation of the comprehensive*  
455 *antibiotic resistance database*. 2016: p. gkw1004.
- 456 57. Zankari, E., et al., *Identification of acquired antimicrobial resistance genes*. 2012. **67**(11): p.  
457 2640-2644.
- 458 58. Gupta, S.K., et al., *ARG-ANNOT, a new bioinformatic tool to discover antibiotic resistance*  
459 *genes in bacterial genomes*. 2014. **58**(1): p. 212-220.
- 460 59. Blin, K., et al., *antiSMASH 5.0: updates to the secondary metabolite genome mining pipeline*.  
461 2019. **47**(W1): p. W81-W87.
- 462 60. Zhang, H., et al., *dbCAN2: a meta server for automated carbohydrate-active enzyme*  
463 *annotation*. 2018. **46**(W1): p. W95-W101.
- 464 61. Potter, S.C., et al., *HMMER web server: 2018 update*. 2018. **46**(W1): p. W200-W204.
- 465 62. Buchfink, B., C. Xie, and D.H.J.N.m. Huson, *Fast and sensitive protein alignment using*  
466 *DIAMOND*. 2015. **12**(1): p. 59-60.
- 467 63. Busk, P.K., et al., *Homology to peptide pattern for annotation of carbohydrate-active*  
468 *enzymes and prediction of function*. 2017. **18**(1): p. 1-9.
- 469 64. Shaw, B., C.J.I.J.o.S. Harding, and E. *Microbiology, Leuconostoc gelidum sp. nov. and*  
470 *Leuconostoc carnosum sp. nov. from chill-stored meats*. *International Journal of Systematic*  
471 *Evolutionary Microbiology*, 1989. **39**(3): p. 217-223.
- 472 65. Kim, B., et al., *Leuconostoc inhae sp. nov., a lactic acid bacterium isolated from kimchi*. 2003.  
473 **53**(4): p. 1123-1126.
- 474 66. Martinez-Murcia, A. and M.J.F.m.l. Collins, *A phylogenetic analysis of an atypical*  
475 *leuconostoc: description of Leuconostoc fallax sp. nov.* 1991. **82**(1): p. 55-59.
- 476 67. De Bruyne, K., et al., *Leuconostoc holzapfelii sp. nov., isolated from Ethiopian coffee*  
477 *fermentation and assessment of sequence analysis of housekeeping genes for delineation of*  
478 *Leuconostoc species*. 2007. **57**(12): p. 2952-2959.
- 479 68. Kim, J.F., et al., *Complete genome sequence of Leuconostoc citreum KM20*. 2008. **190**(8): p.  
480 3093-3094.

- 481 69. Chae, H.S., et al., *Use of a novel Escherichia coli-Leuconostoc shuttle vector for metabolic*  
482 *engineering of Leuconostoc citreum to overproduce D-lactate*. 2013. **79**(5): p. 1428-1435.
- 483 70. Oh, H.-M., et al., *Complete genome sequence analysis of Leuconostoc kimchii IMSNU 11154*.  
484 2010. **192**(14): p. 3844-3845.
- 485 71. Katsuyama, Y. and Y.J.M.i.e. Ohnishi, *Type III polyketide synthases in microorganisms*. 2012.  
486 **515**: p. 359-377.
- 487 72. Abe, I. and H.J.N.p.r. Morita, *Structure and function of the chalcone synthase superfamily of*  
488 *plant type III polyketide synthases*. 2010. **27**(6): p. 809-838.
- 489 73. Grünschow, S., et al., *Substrate profile analysis and ACP-mediated acyl transfer in*  
490 *Streptomyces coelicolor type III polyketide synthases*. 2007.
- 491 74. Hayashi, T., et al., *Fatty Acyl-AMP Ligase Involvement in the Production of Alkylresorcylic Acid*  
492 *by a Myxococcus xanthus Type III Polyketide Synthase*. 2011. **12**(14): p. 2166-2176.
- 493 75. Funai, N., et al., *A novel quinone-forming monooxygenase family involved in modification of*  
494 *aromatic polyketides*. 2005. **280**(15): p. 14514-14523.
- 495 76. Papathanasopoulos, M.A., et al., *Multiple bacteriocin production by Leuconostoc*  
496 *mesenteroides TA33a and other Leuconostoc/Weissella strains*. 1997. **35**(6): p. 331-335.
- 497 77. Revol-Junelles, A.M., et al., *Leuconostoc mesenteroides subsp. mesenteroides FR52*  
498 *synthesizes two distinct bacteriocins*. 1996. **23**(2): p. 120-124.
- 499 78. Blom, H., et al., *Characterization, production, and purification of leucocin H, a two-peptide*  
500 *bacteriocin from Leuconostoc MF215B*. 1999. **39**(1): p. 43-48.
- 501 79. Héchard, Y., et al., *Characterization and purification of mesentericin Y105, an anti-Listeria*  
502 *bacteriocin from Leuconostoc mesenteroides*. 1992. **138**(12): p. 2725-2731.
- 503 80. Woo, C., et al., *Bacteriocin production by Leuconostoc citreum ST110LD isolated from organic*  
504 *farm soil, a promising biopreservative*. Journal of Applied Microbiology, 2021.
- 505 81. Bissaro, B., et al., *Glycosynthesis in a waterworld: new insight into the molecular basis of*  
506 *transglycosylation in retaining glycoside hydrolases*. 2015. **467**(1): p. 17-35.
- 507 82. Lipski, A., et al., *Structural and biochemical characterization of the  $\beta$ -N-*  
508 *acetylglucosaminidase from Thermotoga maritima: toward rationalization of mechanistic*  
509 *knowledge in the GH73 family*. 2015. **25**(3): p. 319-330.
- 510 83. Sauvage, E., et al., *The penicillin-binding proteins: structure and role in peptidoglycan*  
511 *biosynthesis*. FEMS microbiology reviews, 2008. **32**(2): p. 234-258.

512

513

514

515

516

517



519 **Table 1:** Metadata of the strains used in the study. A detailed description of all the strains used in the study along with the assembly statistics such as assembly  
520 size, %GC content, number of CDS, etc. general identification of the strains such as strain Id, NCBI accession number and source etc. are also summarized.

| Strains ID                     | Accession       | BioSample      | BioProject  | Assembly Level | Genome Size(Mb) | GC%     | #CDS | #Contigs | #rRNA | #tRNA | #tmRNA | completeness/<br>contamination | Source                                     |
|--------------------------------|-----------------|----------------|-------------|----------------|-----------------|---------|------|----------|-------|-------|--------|--------------------------------|--------------------------------------------|
| <b>L. carnosum CBA3620</b>     | GCA_007954525.1 | SAMN11843679   | PRJNA544551 | Complete       | 1.70133         | 37.3348 | 1618 | 3        | 12    | 67    | 1      | 99.48/1.05                     | kimchi                                     |
| <b>L. carnosum DSM5576 T</b>   | GCA_014207505.1 | SAMN14908560   | PRJNA632261 | Scaffold       | 1.82066         | 37      | 1740 | 16       | 3     | 49    | 1      | 99.48/1.05                     | chill-stored meats                         |
| <b>L. carnosum JB16</b>        | GCA_000300135.1 | SAMN02603179   | PRJNA174298 | Complete       | 1.77347         | 37.091  | 1655 | 5        | 12    | 67    | 1      | 99.48/1.05                     | Kimchi, Korean traditional fermented food  |
| <b>L. carnosum MFPA29A1405</b> | GCA_900322425.1 | SAMEA104699785 | PRJEB25279  | Contig         | 1.66684         | 37.2698 | 1598 | 22       | 4     | 48    | 1      | 99.48/1.05                     | Beef carpaccio                             |
| <b>L. carnosum MFPC16A2803</b> | GCA_900322415.1 | SAMEA104699786 | PRJEB25280  | Scaffold       | 1.81202         | 36.9587 | 1770 | 50       | 3     | 34    | 1      | 99.48/1.05                     | Beef carpaccio                             |
| <b>L. carnosum WC0318</b>      | GCA_008690985.1 | SAMN11618753   | PRJNA542256 | Scaffold       | 1.74508         | 37.2    | 1655 | 11       | 5     | 51    | 1      | 99.48/1.05                     | Cooked ham                                 |
| <b>L. carnosum WC0319</b>      | GCA_008690925.1 | SAMN11618754   | PRJNA542256 | Scaffold       | 1.69968         | 37.1    | 1610 | 8        | 5     | 49    | 1      | 99.48/1.05                     | Cooked ham                                 |
| <b>L. carnosum WC0320</b>      | GCA_008690965.1 | SAMN11618755   | PRJNA542256 | Contig         | 1.81154         | 37.1    | 1752 | 14       | 5     | 51    | 1      | 99.48/1.05                     | Cooked ham                                 |
| <b>L. carnosum WC0321</b>      | GCA_008690875.1 | SAMN11618756   | PRJNA542256 | Scaffold       | 1.80189         | 37.1    | 1735 | 24       | 5     | 52    | 1      | 99.48/1.05                     | Cooked ham                                 |
| <b>L. carnosum WC0322</b>      | GCA_008690865.1 | SAMN11618757   | PRJNA542256 | Scaffold       | 1.85285         | 37      | 1806 | 13       | 5     | 50    | 1      | 99.48/1.05                     | Cooked ham                                 |
| <b>L. carnosum WC0323</b>      | GCA_008690845.1 | SAMN11618758   | PRJNA542256 | Scaffold       | 1.77288         | 37.2    | 1700 | 17       | 5     | 52    | 1      | 99.48/1.05                     | Cooked ham                                 |
| <b>L. carnosum WC0324</b>      | GCA_008690825.1 | SAMN11618759   | PRJNA542256 | Contig         | 1.76563         | 37.1    | 1699 | 12       | 5     | 49    | 1      | 99.48/1.05                     | Cooked ham                                 |
| <b>L. carnosum WC0325</b>      | GCA_008690785.1 | SAMN11618761   | PRJNA542256 | Scaffold       | 1.8298          | 37.2    | 1773 | 24       | 5     | 52    | 1      | 99.48/1.05                     | Cooked ham                                 |
| <b>L. carnosum WC0326</b>      | GCA_008689765.1 | SAMN11618763   | PRJNA542256 | Contig         | 1.76965         | 37.2    | 1679 | 19       | 5     | 49    | 1      | 99.48/1.05                     | Sausage                                    |
| <b>L. carnosum WC0327</b>      | GCA_008689755.1 | SAMN11618764   | PRJNA542256 | Contig         | 1.76938         | 37.2    | 1678 | 18       | 5     | 49    | 1      | 99.48/1.05                     | Sausage                                    |
| <b>L. carnosum WC0328</b>      | GCA_008689695.1 | SAMN11618767   | PRJNA542256 | Scaffold       | 1.81458         | 37.1    | 1745 | 27       | 5     | 51    | 1      | 98.95/1.05                     | Sausage                                    |
| <b>L. carnosum WC0329</b>      | GCA_008689675.1 | SAMN11618768   | PRJNA542256 | Scaffold       | 1.65083         | 37.2    | 1562 | 13       | 5     | 52    | 1      | 99.48/1.05                     | Cooked ham                                 |
| <b>L. citreum 1301 LGAS</b>    | GCA_001077275.1 | SAMN03197274   | PRJNA267549 | Scaffold       | 1.82335         | 39      | 1715 | 37       | 9     | 60    | 1      | 99.89/0.19                     | Host: Homo sapiens                         |
| <b>L. citreum CBA3621</b>      | GCA_007954785.1 | SAMN11843662   | PRJNA544551 | Complete       | 1.90325         | 38.9138 | 1826 | 2        | 12    | 69    | 1      | 99.89/0.56                     | kimchi                                     |
| <b>L. citreum CBA3623</b>      | GCA_007954705.1 | SAMN11843666   | PRJNA544551 | Complete       | 1.96941         | 38.9123 | 1848 | 6        | 12    | 69    | 1      | 99.33/0                        | kimchi                                     |
| <b>L. citreum CBA3624</b>      | GCA_007954565.1 | SAMN11843677   | PRJNA544551 | Complete       | 1.89477         | 38.9513 | 1778 | 5        | 12    | 69    | 1      | 99.89/0.56                     | kimchi                                     |
| <b>L. citreum CBA3627</b>      | GCA_008033195.1 | SAMN11843672   | PRJNA544551 | Complete       | 1.90325         | 38.9138 | 1824 | 2        | 12    | 69    | 1      | 99.89/0.56                     | kimchi                                     |
| <b>L. citreum CW28</b>         | GCA_002591805.1 | SAMN06343424   | PRJNA375706 | Contig         | 1.98292         | 38.7    | 1873 | 9        | 12    | 69    | 1      | 99.33/0                        | corn fermented beverage                    |
| <b>L. citreum DmW 111</b>      | GCA_002115685.1 | SAMN06767174   | PRJNA383560 | Contig         | 1.82988         | 38.8    | 1768 | 19       | 7     | 53    | 1      | 99.33/0.75                     | from a built environment(Host: Drosophila) |



|                                                   |                 |                |             |            |         |         |      |    |    |    |   |            |                                                                    |
|---------------------------------------------------|-----------------|----------------|-------------|------------|---------|---------|------|----|----|----|---|------------|--------------------------------------------------------------------|
| <b>L. citreum EFEL 2700</b>                       | GCA_002804045.1 | SAMN08014125   | PRJNA418065 | Chromosome | 1.92383 | 38.964  | 1808 | 5  | 12 | 69 | 1 | 99.33/0    | (host:Brassica rapa subsp. pekinensis)                             |
| <b>L. citreum F192-5</b>                          | GCA_008326505.1 | SAMD00166981   | PRJDB8200   | Scaffold   | 2.06178 | 38.4    | 1989 | 42 | 3  | 47 | 1 | 99.89/0    |                                                                    |
| <b>L. citreum G4</b>                              | GCA_006381855.1 | SAMN09099490   | PRJNA470672 | Contig     | 1.83552 | 38.8    | 1770 | 4  | 7  | 52 | 1 | 99.89/0    | sourdough                                                          |
| <b>L. citreum KM20</b>                            | GCA_000026405.1 | SAMN02603482   | PRJNA16062  | Complete   | 1.89661 | 38.8804 | 1777 | 5  | 12 | 69 | 1 | 99.89/0    |                                                                    |
| <b>L. citreum LBAE C10</b>                        | GCA_000239895.2 | SAMEA2272656   | PRJEA78993  | Contig     | 1.93443 | 38.8    | 1850 | 76 | 3  | 49 | 1 | 99.89/0.08 |                                                                    |
| <b>L. citreum LBAE C11</b>                        | GCA_000239915.2 | SAMEA2272136   | PRJEA78995  | Contig     | 1.96996 | 38.7    | 1848 | 83 | 3  | 49 | 1 | 99.89/0    |                                                                    |
| <b>L. citreum LBAE E16</b>                        | GCA_000239935.2 | SAMEA2272523   | PRJEA78997  | Contig     | 1.8016  | 38.9    | 1737 | 45 | 3  | 49 | 1 | 99.89/0    |                                                                    |
| <b>L. citreum NBRC102476</b>                      | GCA_007989545.1 | SAMD00166019   | PRJDB6146   | Contig     | 1.78757 | 38.9    | 1703 | 25 | 3  | 29 | 1 | 99.89/0    |                                                                    |
| <b>L. citreum NRIC1776 T</b>                      | GCA_008326545.1 | SAMD00166982   | PRJDB8200   | Scaffold   | 1.80678 | 38.9    | 1737 | 8  | 3  | 47 | 1 | 99.89/0    | Honey dew of rye ear                                               |
| <b>L. citreum NRRL B-1299</b>                     | GCA_000820985.2 | SAMEA2668124   | PRJEB5537   | Scaffold   | 1.75381 | 39      | 1769 | 1  | 9  | 53 | 1 | 99.33/0    |                                                                    |
| <b>L. citreum NRRL B-742</b>                      | GCA_000820965.2 | SAMEA2668125   | PRJEB5535   | Scaffold   | 1.7181  | 39.2    | 1720 | 1  | 9  | 67 | 1 | 99.25/0    |                                                                    |
| <b>L. citreum TMW21194</b>                        | GCA_009792915.1 | SAMN07739528   | PRJNA401313 | Contig     | 1.73532 | 38.9    | 1639 | 8  | 5  | 51 | 1 | 99.89/0    | food                                                               |
| <b>L. citreum TR116</b>                           | GCA_004359915.1 | SAMN07629511   | PRJNA404070 | Contig     | 1.83094 | 38.8    | 1764 | 31 | 5  | 51 | 1 | 99.89/0    | yellow pea flour sourdough                                         |
| <b>L. citreum TR153</b>                           | GCA_006406175.1 | SAMN09099486   | PRJNA470672 | Contig     | 1.89839 | 38.7    | 1844 | 39 | 5  | 51 | 1 | 99.89/0    | sourdough                                                          |
| <b>L. citreum WiKim0101</b>                       | GCA_009707745.1 | SAMN13267039   | PRJNA588925 | Chromosome | 2.01927 | 38.9102 | 1861 | 6  | 12 | 69 | 1 | 99.16/0.19 | kimchi                                                             |
| <b>L. falkenbergense LMG10779 T</b>               | GCA_014634805.1 | SAMD00244137   | PRJDB7793   | Contig     | 1.96383 | 39.1    | 1876 | 94 | 3  | 50 | 1 | 100/0.18   | fermentating string beans and traditional yogurt                   |
| <b>L. fallax ATCC700006 T</b>                     | GCA_004354645.1 | SAMN08555278   | PRJNA434383 | Scaffold   | 1.66052 | 37.7    | 1589 | 16 | 15 | 86 | 1 | 99.3/0.52  | sauerkraut                                                         |
| <b>L. gelidum subsp gasicomitatum C120c</b>       | GCA_900009505.1 | SAMEA3718674   | PRJEB12226  | Scaffold   | 1.99276 | 36.5    | 1889 | 31 | 3  | 42 | 1 | 99.44/0    | vegetable salad                                                    |
| <b>L. gelidum subsp gasicomitatum C122c</b>       | GCA_900016145.1 | SAMEA3718675   | PRJEB12227  | Scaffold   | 2.00836 | 36.6    | 1914 | 22 | 3  | 43 | 1 | 98.88/0.19 | vegetable salad                                                    |
| <b>L. gelidum subsp gasicomitatum KG16-1</b>      | GCA_001536305.1 | SAMEA3608619   | PRJEB11303  | Complete   | 2.05073 | 36.8506 | 1963 | 4  | 12 | 67 | 1 | 100/0.11   |                                                                    |
| <b>L. gelidum subsp gasicomitatum KSL4-2</b>      | GCA_900016165.1 | SAMEA3718676   | PRJEB12228  | Scaffold   | 2.08949 | 36.6    | 1993 | 23 | 3  | 44 | 1 | 99.33/0.11 | Acetic acid preserved herring with carrots                         |
| <b>L. gelidum subsp gasicomitatum LMG18811 T</b>  | GCA_000196855.1 | SAMEA2272393   | PRJEA48123  | Complete   | 1.95408 | 36.7    | 1862 | 1  | 12 | 68 | 1 | 99.44/0    | modified-atmosphere packaged, tomato-marinated broiler meat strips |
| <b>L. gelidum subsp gasicomitatum MFPA44A1401</b> | GCA_900218135.1 | SAMEA104233143 | PRJEB21908  | Contig     | 1.89091 | 36.8    | 1798 | 50 | 2  | 48 | 1 | 100/0      | beef carpaccio                                                     |
| <b>L. gelidum subsp gasicomitatum PB1a</b>        | GCA_900016185.1 | SAMEA3718677   | PRJEB12229  | Scaffold   | 2.08363 | 36.6    | 1987 | 29 | 3  | 48 | 1 | 99.44/0.56 | carrot                                                             |

|                                                    |                 |              |             |          |         |         |      |     |    |    |   |            |                                           |
|----------------------------------------------------|-----------------|--------------|-------------|----------|---------|---------|------|-----|----|----|---|------------|-------------------------------------------|
| <b>L. gelidum subsp gasicomitatum PB1e</b>         | GCA_900016175.1 | SAMEA3718678 | PRJEB12230  | Scaffold | 2.08518 | 36.5    | 2014 | 22  | 3  | 43 | 1 | 99.44/0    | carrot                                    |
| <b>L. gelidum subsp gasicomitatum PL111</b>        | GCA_900016205.1 | SAMEA3718679 | PRJEB12231  | Scaffold | 2.0581  | 36.5    | 1960 | 29  | 3  | 50 | 1 | 99.44/0    | carrot                                    |
| <b>L. gelidum subsp gasicomitatum TMW 2.1619</b>   | GCA_009296125.1 | SAMN05756392 | PRJNA342276 | Complete | 1.92438 | 36.8534 | 1814 | 4   | 12 | 58 | 1 | 99.64/0.56 | meat                                      |
| <b>L. gelidum subsp gelidum JB7</b>                | GCA_000298875.1 | SAMN02603178 | PRJNA174297 | Complete | 1.8935  | 36.7    | 1768 | 1   | 12 | 67 | 1 | 99.44/0.19 | kimchi, Korean traditional fermented food |
| <b>L. gelidum subsp gelidum KCTC3527 T</b>         | GCA_000166715.2 | SAMN02470198 | PRJNA60229  | Contig   | 1.95728 | 36.6    | 1845 | 43  | 3  | 47 | 1 | 99.44/0.19 | vacuum-packed meats                       |
| <b>L. holzapfelii CCUG54536 T</b>                  | GCA_012396485.1 | SAMN14517846 | PRJNA622446 | Contig   | 1.75843 | 44      | 1668 | 18  | 5  | 50 | 1 | 99.37/0.28 | coffee fermentation                       |
| <b>L. inhae KCTC3774 T</b>                         | GCA_000166735.2 | SAMN02472184 | PRJNA60231  | Contig   | 2.29809 | 36.4    | 1622 | 893 | 3  | 48 | 1 | 95.81/6.07 | kimchi                                    |
| <b>L. kimchii C2</b>                               | GCA_000219785.1 | SAMN02603135 | PRJNA67911  | Complete | 1.87727 | 37.9    | 1792 | 1   | 12 | 68 | 1 | 100/0      | kimchi                                    |
| <b>L. kimchii IMSNU11154 T</b>                     | GCA_000092505.1 | SAMN02603394 | PRJNA40837  | Complete | 2.10179 | 37.9101 | 2025 | 6   | 12 | 68 | 1 | 100/0      | kimchi, a traditional Korean food         |
| <b>L. kimchii NKJ218</b>                           | GCA_004551615.1 | SAMN10887832 | PRJNA521423 | Complete | 1.99344 | 37.7797 | 1892 | 4   | 12 | 68 | 1 | 100/0      | kimchi                                    |
| <b>L. lactis 1300 LCIT</b>                         | GCA_001062635.1 | SAMN03197273 | PRJNA267549 | Scaffold | 1.80711 | 43.1    | 1687 | 58  | 9  | 63 | 1 | 99.44/0.26 | Host: Homo sapiens                        |
| <b>L. lactis aa 0143</b>                           | GCA_004167235.1 | SAMN10239554 | PRJNA496358 | Contig   | 1.73814 | 43.2    | 1637 | 38  | 3  | 46 | 1 | 99.44/0    | stool(host:Homo sapiens)                  |
| <b>L. lactis BIOML-A1</b>                          | GCA_009678855.1 | SAMN11946164 | PRJNA544527 | Contig   | 1.748   | 43.1    | 1632 | 30  | 4  | 46 | 1 | 99.44/0    | (host:Homo sapiens)                       |
| <b>L. lactis CBA3625</b>                           | GCA_007954605.1 | SAMN11843673 | PRJNA544551 | Complete | 1.79161 | 43.3467 | 1714 | 2   | 12 | 68 | 1 | 99.44/0.56 | kimchi                                    |
| <b>L. lactis CBA3626</b>                           | GCA_007954665.1 | SAMN11843668 | PRJNA544551 | Complete | 1.83981 | 43.1491 | 1742 | 2   | 12 | 70 | 1 | 99.44/1.12 | kimchi                                    |
| <b>L. lactis CCK940</b>                            | GCA_002287365.1 | SAMN07482638 | PRJNA397634 | Contig   | 1.74151 | 43.3    | 1657 | 2   | 12 | 69 | 1 | 100/0      | kimchi                                    |
| <b>L. lactis KACC91922</b>                         | GCA_000709265.1 | SAMN02730106 | PRJNA244961 | Contig   | 1.68817 | 43.4    | 1619 | 35  | 3  | 50 | 1 | 99.44/0.67 | Kimchi                                    |
| <b>L. lactis KCTC3773</b>                          | GCA_000179875.1 | SAMN02470199 | PRJNA52539  | Contig   | 1.72068 | 42.9    | 1663 | 98  | 3  | 48 | 1 | 99.44/0    |                                           |
| <b>L. lactis KFRI01</b>                            | GCA_001998805.1 | SAMN05219201 | PRJNA325075 | Complete | 1.71519 | 43.3281 | 1613 | 3   | 12 | 69 | 1 | 99.44/0    | kimchi                                    |
| <b>L. lactis LN19</b>                              | GCA_002092595.1 | SAMN05981500 | PRJNA352459 | Contig   | 1.72439 | 42.9    | 1633 | 47  | 6  | 51 | 1 | 99.44/0.14 | dairy                                     |
| <b>L. lactis LN24</b>                              | GCA_002092695.1 | SAMN05981502 | PRJNA352459 | Contig   | 1.72466 | 42.9    | 1641 | 48  | 6  | 52 | 1 | 99.44/0.14 | dairy                                     |
| <b>L. lactis NBRC 12455</b>                        | GCA_006539105.1 | SAMD00097163 | PRJDB6024   | Contig   | 1.64349 | 43.5    | 1531 | 49  | 3  | 39 |   | 99.44/0    |                                           |
| <b>L. lactis WiKim40</b>                           | GCA_001698145.1 | SAMN05300424 | PRJNA327015 | Complete | 1.78807 | 43.1131 | 1654 | 4   | 12 | 68 | 1 | 100/0.56   | Kimchi                                    |
| <b>L. litichii MB7 T</b>                           | GCA_008107645.1 | SAMN10786216 | PRJNA516297 | Scaffold | 1.86586 | 35.8    | 1789 | 13  | 3  | 48 | 1 | 100/0      | Litchi chinensis                          |
| <b>L. mesenteroides CBA3628</b>                    | GCA_007954745.1 | SAMN11843664 | PRJNA544551 | Complete | 1.86456 | 36.9975 | 1757 | 4   | 12 | 71 | 1 | 100/0      | kimchi                                    |
| <b>L. mesenteroides subsp cremoris ATCC19254 T</b> | GCA_000160595.1 | SAMN00139187 | PRJNA34629  | Scaffold | 1.73507 | 38.5    | 1511 | 29  | 3  | 49 | 1 | 100/0      | Hansen's dried starter powder             |

|                                                        |                 |              |             |          |         |      |      |     |   |    |   |          |       |
|--------------------------------------------------------|-----------------|--------------|-------------|----------|---------|------|------|-----|---|----|---|----------|-------|
| <b>L. mesenteroides<br/>subsp cremoris<br/>LMGCF01</b> | GCA_002092045.1 | SAMN05981463 | PRJNA352459 | Contig   | 1.64067 | 38   | 1449 | 115 | 5 | 51 | 1 | 99.82/0  | dairy |
| <b>L. mesenteroides<br/>subsp cremoris<br/>LMGCF02</b> | GCA_002092135.1 | SAMN05981464 | PRJNA352459 | Contig   | 1.72228 | 37.9 | 1570 | 112 | 5 | 53 | 1 | 100/0    | dairy |
| <b>L. mesenteroides<br/>subsp cremoris<br/>LMGCF03</b> | GCA_002092145.1 | SAMN05981465 | PRJNA352459 | Contig   | 1.66544 | 38   | 1494 | 116 | 5 | 53 | 1 | 100/0    | dairy |
| <b>L. mesenteroides<br/>subsp cremoris<br/>LMGCF04</b> | GCA_002092155.1 | SAMN05981466 | PRJNA352459 | Contig   | 1.64019 | 38   | 1446 | 124 | 5 | 52 | 1 | 100/0    | dairy |
| <b>L. mesenteroides<br/>subsp cremoris<br/>LMGCF05</b> | GCA_002092085.1 | SAMN05981467 | PRJNA352459 | Contig   | 1.63731 | 38   | 1452 | 118 | 5 | 53 | 1 | 100/0    | dairy |
| <b>L. mesenteroides<br/>subsp cremoris<br/>LMGCF07</b> | GCA_002092215.1 | SAMN05981469 | PRJNA352459 | Scaffold | 1.63929 | 38.1 | 1431 | 109 | 5 | 53 | 1 | 100/0    | dairy |
| <b>L. mesenteroides<br/>subsp cremoris<br/>LMGCF09</b> | GCA_002092105.1 | SAMN05981471 | PRJNA352459 | Contig   | 1.62909 | 38.1 | 1468 | 105 | 5 | 53 | 1 | 100/0    | dairy |
| <b>L. mesenteroides<br/>subsp cremoris<br/>LMGCF10</b> | GCA_002092245.1 | SAMN05981472 | PRJNA352459 | Contig   | 1.61642 | 38   | 1452 | 109 | 5 | 51 | 1 | 100/0    | dairy |
| <b>L. mesenteroides<br/>subsp cremoris<br/>LMGCF11</b> | GCA_002092315.1 | SAMN05981473 | PRJNA352459 | Contig   | 1.67437 | 38.2 | 1488 | 86  | 5 | 53 | 1 | 99.87/0  | dairy |
| <b>L. mesenteroides<br/>subsp cremoris<br/>LMGCF12</b> | GCA_002092385.1 | SAMN05981474 | PRJNA352459 | Contig   | 1.66343 | 38.1 | 1474 | 113 | 4 | 54 | 1 | 100/0.53 | dairy |
| <b>L. mesenteroides<br/>subsp cremoris<br/>LMGCF13</b> | GCA_002092465.1 | SAMN05981475 | PRJNA352459 | Contig   | 1.63644 | 38.3 | 1451 | 219 | 4 | 50 | 1 | 100/1.06 | dairy |
| <b>L. mesenteroides<br/>subsp cremoris<br/>LMGCF14</b> | GCA_002092335.1 | SAMN05981476 | PRJNA352459 | Contig   | 1.62752 | 38   | 1462 | 105 | 5 | 52 | 1 | 100/0    | dairy |
| <b>L. mesenteroides<br/>subsp cremoris<br/>LMGCF16</b> | GCA_002092515.1 | SAMN05981478 | PRJNA352459 | Contig   | 1.61323 | 38   | 1448 | 124 | 5 | 52 | 1 | 100/0    | dairy |
| <b>L. mesenteroides<br/>subsp cremoris<br/>LMGCF17</b> | GCA_002092425.1 | SAMN05981479 | PRJNA352459 | Contig   | 1.62949 | 38   | 1457 | 101 | 5 | 52 | 1 | 100/0    | dairy |
| <b>L. mesenteroides<br/>subsp cremoris<br/>LMGCF18</b> | GCA_002092495.1 | SAMN05981480 | PRJNA352459 | Contig   | 1.62399 | 38   | 1456 | 105 | 5 | 52 | 1 | 100/0    | dairy |

|                                                      |                 |              |             |          |         |         |      |     |    |    |   |            |                                                         |
|------------------------------------------------------|-----------------|--------------|-------------|----------|---------|---------|------|-----|----|----|---|------------|---------------------------------------------------------|
| <b>L. mesenteroides subsp cremoris LMGCF19</b>       | GCA_002092415.1 | SAMN05981481 | PRJNA352459 | Contig   | 1.64533 | 38      | 1517 | 113 | 5  | 53 | 1 | 100/0      | dairy                                                   |
| <b>L. mesenteroides subsp cremoris LMGCF20</b>       | GCA_002092455.1 | SAMN05981482 | PRJNA352459 | Contig   | 1.63087 | 38      | 1474 | 109 | 5  | 53 | 1 | 99.74/0    | dairy                                                   |
| <b>L. mesenteroides subsp cremoris LN07</b>          | GCA_002092615.1 | SAMN05981497 | PRJNA352459 | Contig   | 1.59621 | 38.1    | 1424 | 107 | 5  | 52 | 1 | 100/0      | dairy                                                   |
| <b>L. mesenteroides subsp cremoris T26</b>           | GCA_000686485.1 | SAMN02767914 | PRJNA205545 | Scaffold | 1.83247 | 38.4    | 1690 | 123 | 3  | 56 | 1 | 100/10.23  | mesophilic cheese starter cultures                      |
| <b>L. mesenteroides subsp cremoris TIFN8</b>         | GCA_000447945.1 | SAMN02472108 | PRJNA175676 | Contig   | 1.71009 | 38.2    | 1452 | 173 | 7  | 61 |   | 99.21/0.26 | propagated starter culture used in cheese manufacturing |
| <b>L. mesenteroides subsp dextranicum DSM20484 T</b> | GCA_001047695.1 | SAMN03105774 | PRJNA263697 | Complete | 1.85473 | 38.0389 | 1692 | 2   | 12 | 71 | 1 | 100/0.79   | Cheese                                                  |
| <b>L. mesenteroides subsp dextranicum FAM 18356</b>  | GCA_005864365.1 | SAMN11653949 | PRJNA543085 | Contig   | 1.87153 | 37.8    | 1707 | 40  | 5  | 53 | 1 | 100/0      |                                                         |
| <b>L. mesenteroides subsp dextranicum FM06</b>       | GCA_002148235.1 | SAMN06061940 | PRJNA355067 | Complete | 1.94688 | 37.9649 | 1746 | 4   | 12 | 71 | 1 | 100/0      | 10 weeks old 45+ Samsø cheese                           |
| <b>L. mesenteroides subsp dextranicum LbT16</b>      | GCA_001184265.1 | SAMN03463677 | PRJNA280520 | Contig   | 1.90636 | 37.8    | 1733 | 65  | 3  | 51 | 1 | 99.47/0    | Taleggio cheese                                         |
| <b>L. mesenteroides subsp dextranicum LN05</b>       | GCA_002092565.1 | SAMN05981496 | PRJNA352459 | Contig   | 2.00187 | 38      | 1835 | 250 | 16 | 57 | 1 | 98.53/2.95 | dairy                                                   |
| <b>L. mesenteroides subsp dextranicum LN08</b>       | GCA_002092625.1 | SAMN05981498 | PRJNA352459 | Contig   | 1.96519 | 37.8    | 1866 | 106 | 5  | 54 | 1 | 100/0      | dairy                                                   |
| <b>L. mesenteroides subsp dextranicum LN32</b>       | GCA_002092705.1 | SAMN05981505 | PRJNA352459 | Contig   | 1.84828 | 37.8    | 1696 | 68  | 5  | 54 | 1 | 100/0      | dairy                                                   |
| <b>L. mesenteroides subsp dextranicum LN34</b>       | GCA_002092775.1 | SAMN05981506 | PRJNA352459 | Contig   | 1.87513 | 37.7    | 1719 | 110 | 5  | 53 | 1 | 100/0      | dairy                                                   |
| <b>L. mesenteroides subsp dextranicum NCTC10817</b>  | GCA_900452955.1 | SAMEA4362418 | PRJEB6403   | Contig   | 1.97325 | 37.8    | 1860 | 3   | 12 | 71 | 1 | 100/0.53   |                                                         |
| <b>L. mesenteroides subsp dextranicum OG2</b>        | GCA_002276945.1 | SAMN06718482 | PRJNA375758 | Contig   | 1.71628 | 37.9    | 1583 | 146 | 7  | 51 | 1 | 100/0      | kefir                                                   |
| <b>L. mesenteroides subsp dextranicum P45</b>        | GCA_000756355.1 | SAMN03032191 | PRJNA260860 | Contig   | 1.87419 | 37.5    | 1726 | 6   | 9  | 52 | 1 | 100/0      | fermented pulque                                        |

|                                                                                  |                 |              |             |          |         |         |      |    |    |    |   |            |                              |
|----------------------------------------------------------------------------------|-----------------|--------------|-------------|----------|---------|---------|------|----|----|----|---|------------|------------------------------|
| <b>L. mesenteroides</b><br>subsp <b>dextranicum</b><br><b>WC0331</b>             | GCA_008690745.1 | SAMN11618762 | PRJNA542256 | Scaffold | 2.01813 | 37.6    | 1923 | 10 | 5  | 53 | 1 | 100/0.53   | Cooked ham                   |
| <b>L. mesenteroides</b><br>subsp<br><b>jonggajibkimchii B5</b>                   | GCA_004745755.1 | SAMN10484942 | PRJNA507123 | Contig   | 2.12682 | 37.5    | 2037 | 26 | 5  | 53 | 1 | 100/0.18   | Mike cake                    |
| <b>L. mesenteroides</b><br>subsp<br><b>jonggajibkimchii</b><br><b>BD3749</b>     | GCA_001583825.1 | SAMN04508169 | PRJNA312878 | Complete | 1.98657 | 37.8    | 1898 | 1  | 12 | 71 | 1 | 100/0      | fermeted vegetable           |
| <b>L. mesenteroides</b><br>subsp<br><b>jonggajibkimchii</b><br><b>CBA7131</b>    | GCA_003255835.1 | SAMN07206913 | PRJNA390217 | Complete | 2.08731 | 37.6375 | 1986 | 4  | 12 | 71 | 1 | 99.47/0    | Korean adult feces           |
| <b>L. mesenteroides</b><br>subsp<br><b>jonggajibkimchii</b><br><b>DRC1506 T</b>  | GCA_001886915.1 | SAMN04198570 | PRJNA299366 | Complete | 1.98392 | 37.6424 | 1787 | 4  | 12 | 71 | 1 | 99.89/0.53 | Kimchi                       |
| <b>L. mesenteroides</b><br>subsp<br><b>jonggajibkimchii KFRI-</b><br><b>MG</b>   | GCA_000512955.1 | SAMN02641526 | PRJNA18679  | Complete | 1.89641 | 37.7    | 1796 | 1  | 12 | 69 | 1 | 100/0      |                              |
| <b>L. mesenteroides</b><br>subsp<br><b>jonggajibkimchii</b><br><b>KIBGE-IB22</b> | GCA_005049065.1 | SAMN11431368 | PRJNA532993 | Scaffold | 1.94823 | 37.5    | 1880 | 13 | 3  | 50 | 1 | 100/0.18   | cabbage(host:Vegetables)     |
| <b>L. mesenteroides</b><br>subsp<br><b>jonggajibkimchii</b><br><b>SRCM102735</b> | GCA_009913935.1 | SAMN08707610 | PRJNA438180 | Complete | 2.05844 | 37.5883 | 1982 | 4  | 12 | 71 | 1 | 100/0      | Soybean paste (Chonggugjang) |
| <b>L. mesenteroides</b><br>subsp<br><b>jonggajibkimchii</b><br><b>SRCM103356</b> | GCA_004102585.1 | SAMN10742283 | PRJNA515114 | Complete | 2.03939 | 37.5826 | 1984 | 4  | 12 | 71 | 1 | 100/0.18   | food                         |
| <b>L. mesenteroides</b><br>subsp<br><b>jonggajibkimchii</b><br><b>SRCM103453</b> | GCA_004103675.1 | SAMN10754493 | PRJNA515383 | Complete | 2.1826  | 37.6453 | 2090 | 5  | 12 | 71 | 1 | 100/0      | food                         |
| <b>L. mesenteroides</b><br>subsp<br><b>jonggajibkimchii</b><br><b>SRCM103460</b> | GCA_004194375.1 | SAMN10743321 | PRJNA515149 | Complete | 2.08721 | 37.5882 | 1996 | 5  | 12 | 71 | 1 | 100/0      | food                         |
| <b>L. mesenteroides</b><br>subsp<br><b>jonggajibkimchii</b><br><b>WC0333</b>     | GCA_008689685.1 | SAMN11618766 | PRJNA542256 | Contig   | 2.08859 | 37.5    | 2031 | 35 | 5  | 53 | 1 | 100/0      | Sausage                      |

|                                                                 |                 |                |             |          |         |         |      |     |    |    |   |            |                   |
|-----------------------------------------------------------------|-----------------|----------------|-------------|----------|---------|---------|------|-----|----|----|---|------------|-------------------|
| <b>L. mesenteroides</b><br>subsp<br>jonggajibkimchii<br>Wikim33 | GCA_003433375.1 | SAMN07156024   | PRJNA387486 | Complete | 1.97006 | 37.6362 | 1883 | 4   | 12 | 71 | 1 | 100/0      | Baechu-kimchi     |
| <b>L. mesenteroides</b><br>subsp mesenteroides<br>CBA3607       | GCA_009676745.1 | SAMN13258970   | PRJNA544551 | Complete | 1.85432 | 37.008  | 1750 | 3   | 12 | 71 | 1 | 100/0      | kimchi            |
| <b>L. mesenteroides</b><br>subsp mesenteroides<br>213M0         | GCA_001570665.1 | SAMD00042708   | PRJDB4328   | Contig   | 2.03285 | 37.7    | 1946 | 58  | 3  | 49 | 1 | 99.93/0.53 |                   |
| <b>L. mesenteroides</b><br>subsp mesenteroides<br>406           | GCA_001515385.1 | SAMD00042709   | PRJDB4329   | Contig   | 2.00431 | 37.7    | 1932 | 69  | 3  | 49 | 1 | 100/1.06   |                   |
| <b>L. mesenteroides</b><br>subsp mesenteroides<br>ATCC8293 T    | GCA_000014445.1 | SAMN02598482   | PRJNA315    | Complete | 2.07576 | 37.6586 | 1967 | 2   | 12 | 71 | 1 | 100/0.53   | fermenting olives |
| <b>L. mesenteroides</b><br>subsp mesenteroides<br>AtHG50        | GCA_004368765.1 | SAMN08777814   | PRJNA441539 | Scaffold | 2.03285 | 37.7    | 1960 | 60  | 3  | 52 | 1 | 100/0.53   |                   |
| <b>L. mesenteroides</b><br>subsp mesenteroides<br>BD1710        | GCA_002117185.1 | SAMN04530070   | PRJNA314170 | Complete | 2.12404 | 37.6    | 2014 | 1   | 12 | 71 | 1 | 100/0.53   | kefir             |
| <b>L. mesenteroides</b><br>subsp mesenteroides<br>CECT9217      | GCA_900290445.1 | SAMEA104569583 | PRJEB24702  | Contig   | 2.02219 | 37.7    | 1932 | 13  | 5  | 53 | 1 | 100/0      |                   |
| <b>L. mesenteroides</b><br>subsp mesenteroides<br>CECT9266      | GCA_900312985.1 | SAMEA104569776 | PRJEB24710  | Contig   | 2.10613 | 37.7    | 2032 | 44  | 5  | 53 | 1 | 99.82/0    |                   |
| <b>L. mesenteroides</b><br>subsp mesenteroides<br>CECT9268      | GCA_900290155.1 | SAMEA104569777 | PRJEB24712  | Contig   | 2.07557 | 37.7    | 2002 | 26  | 5  | 53 | 1 | 99.82/0    |                   |
| <b>L. mesenteroides</b><br>subsp mesenteroides<br>DE0394        | GCA_007673005.1 | SAMN11792554   | PRJNA543692 | Scaffold | 1.93918 | 37.7    | 1816 | 358 | 3  | 48 | 1 | 100/1.6    | environmental     |
| <b>L. mesenteroides</b><br>subsp mesenteroides<br>DRC0211       | GCA_002009375.1 | SAMN04198273   | PRJNA299363 | Complete | 2.1241  | 37.5981 | 1962 | 5   | 12 | 71 | 1 | 100/0      | Kimchi            |
| <b>L. mesenteroides</b><br>subsp mesenteroides<br>GL1           | GCA_001541125.1 | SAMN04231183   | PRJNA300958 | Scaffold | 1.81597 | 38.1    | 1649 | 11  | 2  | 35 | 1 | 100/0.79   | Dromedary milk    |
| <b>L. mesenteroides</b><br>subsp mesenteroides<br>J18           | GCA_000234825.3 | SAMN02603136   | PRJNA75083  | Complete | 2.01726 | 37.6784 | 1883 | 5   | 12 | 71 | 1 | 100/0      |                   |
| <b>L. mesenteroides</b><br>subsp mesenteroides<br>KMB608        | GCA_003346165.1 | SAMN09398940   | PRJNA474823 | Contig   | 1.95951 | 37.7    | 1877 | 81  | 3  | 46 | 1 | 100/0      | sheep milk        |

|                                                        |                 |              |             |          |         |         |      |     |    |    |   |          |                              |
|--------------------------------------------------------|-----------------|--------------|-------------|----------|---------|---------|------|-----|----|----|---|----------|------------------------------|
| <b>L. mesenteroides subsp mesenteroides KMB609</b>     | GCA_003346155.1 | SAMN09398941 | PRJNA474823 | Contig   | 2.01223 | 37.7    | 1930 | 84  | 3  | 47 | 1 | 100/0.53 | bryndza cheese               |
| <b>L. mesenteroides subsp mesenteroides KMB611</b>     | GCA_003346345.1 | SAMN09398943 | PRJNA474823 | Contig   | 2.10341 | 37.5    | 2037 | 33  | 3  | 46 | 1 | 100/0.53 | bryndza cheese               |
| <b>L. mesenteroides subsp mesenteroides LbE15</b>      | GCA_001184245.1 | SAMN03463642 | PRJNA280507 | Contig   | 2.00792 | 37.6    | 1923 | 63  | 3  | 51 | 1 | 100/0    | Taleggio cheese              |
| <b>L. mesenteroides subsp mesenteroides LbE16</b>      | GCA_001184255.1 | SAMN03463665 | PRJNA280516 | Contig   | 2.03609 | 37.5    | 1964 | 85  | 3  | 51 | 1 | 100/0.53 | Taleggio cheese              |
| <b>L. mesenteroides subsp mesenteroides LK-151</b>     | GCA_002370415.1 | SAMD00065790 | PRJDB5233   | Complete | 2.13737 | 37.7366 | 2017 | 4   | 9  | 68 | 1 | 100/0    |                              |
| <b>L. mesenteroides subsp mesenteroides LN25</b>       | GCA_002092735.1 | SAMN05981503 | PRJNA352459 | Contig   | 2.2776  | 37.5    | 2180 | 70  | 6  | 54 | 1 | 100/1.06 | dairy                        |
| <b>L. mesenteroides subsp mesenteroides LN27</b>       | GCA_002092745.1 | SAMN05981504 | PRJNA352459 | Contig   | 2.2246  | 37.5    | 2123 | 54  | 6  | 54 | 1 | 100/1.06 | dairy                        |
| <b>L. mesenteroides subsp mesenteroides M11</b>        | GCA_009497095.1 | SAMN13018494 | PRJNA577063 | Scaffold | 1.97939 | 37.8    | 1863 | 79  | 3  | 52 | 1 | 100/1.06 | (host:Oreochromis niloticus) |
| <b>L. mesenteroides subsp mesenteroides NBRC102481</b> | GCA_007989505.1 | SAMD00166021 | PRJDB6187   | Contig   | 1.69543 | 37.8    | 1630 | 109 | 3  | 45 | 1 | 98.41/0  |                              |
| <b>L. mesenteroides subsp mesenteroides NBRC3832</b>   | GCA_006538765.1 | SAMD00093693 | PRJDB6025   | Contig   | 1.90981 | 37.6    | 1789 | 31  | 3  | 45 | 1 | 100/0.53 |                              |
| <b>L. mesenteroides subsp mesenteroides SRCM102733</b> | GCA_009913915.1 | SAMN08707608 | PRJNA438180 | Complete | 2.05873 | 37.7211 | 1967 | 3   | 12 | 71 | 1 | 100/0    | Gochujang                    |
| <b>L. mesenteroides subsp mesenteroides TR154</b>      | GCA_006406185.1 | SAMN09099487 | PRJNA470672 | Contig   | 1.85995 | 37.8    | 1756 | 43  | 5  | 53 | 1 | 100/0    | sourdough                    |
| <b>L. mesenteroides subsp mesenteroides WC0330</b>     | GCA_008690805.1 | SAMN11618760 | PRJNA542256 | Scaffold | 1.76569 | 37.9    | 1637 | 41  | 4  | 54 | 1 | 100/0.26 | Cooked ham                   |
| <b>L. mesenteroides subsp mesenteroides WC0332</b>     | GCA_008689715.1 | SAMN11618765 | PRJNA542256 | Contig   | 1.8553  | 37.7    | 1744 | 39  | 5  | 54 | 1 | 100/0    | Sausage                      |
| <b>L. mesenteroides subsp mesenteroides Wikim17</b>    | GCA_000787735.1 | SAMD00022975 | PRJDB3305   | Contig   | 1.85932 | 37.8    | 1748 | 41  | 4  | 53 | 1 | 100/0.26 |                              |

|                                                  |                 |              |             |          |         |         |      |     |    |    |   |            |                                    |
|--------------------------------------------------|-----------------|--------------|-------------|----------|---------|---------|------|-----|----|----|---|------------|------------------------------------|
| <b>L. mesenteroides subsp mesenteroides YL48</b> | GCA_002886025.1 | SAMN06298812 | PRJNA371414 | Contig   | 2.0584  | 37.6    | 1975 | 154 | 6  | 54 | 1 | 100/0      | Root Surface(host:Carrot)          |
| <b>L. pseudomesenteroides 1159</b>               | GCA_000686465.1 | SAMN02767913 | PRJNA205546 | Scaffold | 2.03869 | 39      | 1969 | 100 | 3  | 49 | 1 | 100/0      | mesophilic cheese starter cultures |
| <b>L. pseudomesenteroides 4882</b>               | GCA_000297375.1 | SAMEA3138421 | PRJNA84285  | Contig   | 2.00859 | 39.1    | 1936 | 106 | 5  | 59 | 1 | 93.12/0.18 |                                    |
| <b>L. pseudomesenteroides AMBR10</b>             | GCA_901830415.1 | SAMEA5665507 | PRJEB32716  | Contig   | 2.29673 | 39.2    | 2248 | 338 | 7  | 56 | 1 | 100/0.7    | Human adenoid                      |
| <b>L. pseudomesenteroides BM2</b>                | GCA_002092535.1 | SAMN05981461 | PRJNA352459 | Contig   | 2.02255 | 39      | 1997 | 101 | 7  | 53 | 1 | 100/0      | dairy                              |
| <b>L. pseudomesenteroides CBA3630</b>            | GCA_008033175.1 | SAMN11843675 | PRJNA544551 | Complete | 2.31609 | 38.9999 | 2171 | 4   | 12 | 70 | 1 | 99.82/0.18 | kimchi                             |
| <b>L. pseudomesenteroides HPK01</b>              | GCA_002092075.1 | SAMN05981330 | PRJNA352459 | Contig   | 1.95326 | 39.1    | 1853 | 92  | 5  | 51 | 1 | 100/0      | dairy starter                      |
| <b>L. pseudomesenteroides KMB610</b>             | GCA_003346375.1 | SAMN09398942 | PRJNA474823 | Contig   | 1.9824  | 39      | 1919 | 57  | 3  | 43 | 1 | 100/0      | bryndza cheese                     |
| <b>L. pseudomesenteroides LMG11482 T</b>         | GCA_014634745.1 | SAMD00239684 | PRJDB7793   | Contig   | 2.09581 | 38.9    | 1971 | 29  | 4  | 50 | 1 | 99.82/0    | cane juice                         |
| <b>L. pseudomesenteroides LMGCF06</b>            | GCA_002092035.1 | SAMN05981468 | PRJNA352459 | Contig   | 1.95205 | 39.1    | 1848 | 83  | 5  | 51 | 1 | 100/0      | dairy                              |
| <b>L. pseudomesenteroides LMGCF08</b>            | GCA_002092165.1 | SAMN05981470 | PRJNA352459 | Contig   | 2.19336 | 39.1    | 2069 | 267 | 5  | 53 | 1 | 100/11.2   | dairy                              |
| <b>L. pseudomesenteroides LMGCF15</b>            | GCA_002092375.1 | SAMN05981477 | PRJNA352459 | Contig   | 1.92427 | 39.1    | 1833 | 78  | 5  | 51 | 1 | 100/0      | dairy                              |
| <b>L. pseudomesenteroides LMGH100</b>            | GCA_002072505.1 | SAMN05981487 | PRJNA352459 | Contig   | 2.06006 | 39.1    | 1903 | 238 | 4  | 52 | 1 | 98.7/2.61  | dairy                              |
| <b>L. pseudomesenteroides LMGH278</b>            | GCA_002072495.1 | SAMN05981488 | PRJNA352459 | Contig   | 1.9401  | 39.1    | 1852 | 106 | 5  | 51 | 1 | 100/0      | dairy                              |
| <b>L. pseudomesenteroides LMGH280</b>            | GCA_002072555.1 | SAMN05981489 | PRJNA352459 | Contig   | 1.98015 | 39.1    | 1861 | 85  | 4  | 55 | 1 | 100/0.71   | dairy                              |



|                                               |                 |              |             |          |         |      |      |     |   |    |   |            |                                             |
|-----------------------------------------------|-----------------|--------------|-------------|----------|---------|------|------|-----|---|----|---|------------|---------------------------------------------|
| <b>L. pseudomesenteroides LMGH284</b>         | GCA_002072575.1 | SAMN05981490 | PRJNA352459 | Scaffold | 2.07199 | 39   | 1952 | 222 | 4 | 52 | 1 | 99.21/2.03 | dairy                                       |
| <b>L. pseudomesenteroides LMGH61</b>          | GCA_002072515.1 | SAMN05981483 | PRJNA352459 | Scaffold | 2.00878 | 39.1 | 1901 | 62  | 4 | 54 | 1 | 100/0      | dairy                                       |
| <b>L. pseudomesenteroides LMGH83</b>          | GCA_002072475.1 | SAMN05981484 | PRJNA352459 | Contig   | 2.05883 | 39.1 | 1885 | 201 | 4 | 53 | 1 | 98.4/1.41  | dairy                                       |
| <b>L. pseudomesenteroides LMGH95</b>          | GCA_002072565.1 | SAMN05981485 | PRJNA352459 | Contig   | 1.98982 | 39   | 1948 | 171 | 5 | 51 | 1 | 100/0.18   | dairy                                       |
| <b>L. pseudomesenteroides LMGH97</b>          | GCA_002072585.1 | SAMN05981486 | PRJNA352459 | Contig   | 1.98975 | 39   | 1946 | 132 | 5 | 50 | 1 | 100/0      | dairy                                       |
| <b>L. pseudomesenteroides LMGTW1</b>          | GCA_002092235.1 | SAMN05981491 | PRJNA352459 | Contig   | 1.9692  | 39   | 1924 | 125 | 5 | 52 | 1 | 100/0      | dairy                                       |
| <b>L. pseudomesenteroides LMGTW3</b>          | GCA_002092355.1 | SAMN05981492 | PRJNA352459 | Contig   | 1.89805 | 39.1 | 1834 | 87  | 5 | 52 | 1 | 100/0      | dairy                                       |
| <b>L. pseudomesenteroides LMGTW6</b>          | GCA_002092255.1 | SAMN05981493 | PRJNA352459 | Contig   | 1.88144 | 39.1 | 1821 | 90  | 5 | 52 | 1 | 100/0      | dairy                                       |
| <b>L. pseudomesenteroides LMGTW8</b>          | GCA_002092295.1 | SAMN05981494 | PRJNA352459 | Contig   | 1.98207 | 39   | 1936 | 118 | 5 | 52 | 1 | 100/0      | dairy                                       |
| <b>L. pseudomesenteroides LN02</b>            | GCA_002092555.1 | SAMN05981495 | PRJNA352459 | Contig   | 1.91243 | 39.1 | 1803 | 88  | 6 | 53 | 1 | 100/0      | dairy                                       |
| <b>L. pseudomesenteroides LN12</b>            | GCA_002092635.1 | SAMN05981499 | PRJNA352459 | Contig   | 1.86409 | 39.1 | 1762 | 85  | 6 | 52 | 1 | 100/0      | dairy                                       |
| <b>L. pseudomesenteroides LN23</b>            | GCA_002092645.1 | SAMN05981501 | PRJNA352459 | Contig   | 1.99273 | 39.1 | 1936 | 126 | 5 | 47 | 1 | 100/0.18   | dairy                                       |
| <b>L. pseudomesenteroides MGYG-HGUT-00096</b> | GCA_902363165.1 | SAMEA5849597 | PRJEB33885  | Scaffold | 2.29682 |      |      | 33  | 4 | 52 | 1 | 99.82/0    | human gut                                   |
| <b>L. pseudomesenteroides PS12</b>            | GCA_000686505.1 | SAMN02767912 | PRJNA205547 | Scaffold | 1.93438 | 39.1 | 1863 | 91  | 3 | 48 | 1 | 100/0      | undefined mesophilic cheese starter culture |
| <b>L. pseudomesenteroides TR070</b>           | GCA_006382035.1 | SAMN09099485 | PRJNA470672 | Contig   | 2.23055 | 38.8 | 2162 | 76  | 5 | 52 | 1 | 99.82/0    | sourdough                                   |
| <b>L. rapi DSM27776 T</b>                     | GCA_016908715.1 | SAMN17619917 | PRJNA695649 | Contig   | 1.92491 | 38   | 1843 | 24  | 3 | 49 | 1 | 100/1.24   | rutabaga                                    |

|                                |                 |                |             |          |         |         |      |    |    |    |   |          |                |
|--------------------------------|-----------------|----------------|-------------|----------|---------|---------|------|----|----|----|---|----------|----------------|
| <b>L. suionicum CECT 8486</b>  | GCA_900289255.1 | SAMEA104569300 | PRJEB24691  | Contig   | 2.07002 | 37.3    | 1968 | 20 | 5  | 53 | 1 | 100/0.53 |                |
| <b>L. suionicum CECT 9216</b>  | GCA_900290145.1 | SAMEA104569335 | PRJEB24693  | Contig   | 2.06953 | 37.3    | 1972 | 18 | 5  | 53 | 1 | 100/0.53 |                |
| <b>L. suionicum CECT8484</b>   | GCA_900289205.1 | SAMEA104569299 | PRJEB24690  | Contig   | 2.06903 | 37.3    | 1974 | 18 | 5  | 53 | 1 | 100/0.53 |                |
| <b>L. suionicum DSM20241 T</b> | GCA_001891125.1 | SAMN04811211   | PRJNA318320 | Complete | 2.04883 | 37.5936 | 1923 | 2  | 12 | 71 | 1 | 100/0    | Source unknown |

522 **Table:2:** A descriptive list of the earlier classification and robust reclassification of the strain based on this study.

523

| Strains ID                     | Earlier taxonomy   | Taxonomy status | Proposed taxonomy  |
|--------------------------------|--------------------|-----------------|--------------------|
| <i>L. carnosum</i> CBA3620     | <i>L. carnosum</i> | Correct         | <i>L. carnosum</i> |
| <i>L. carnosum</i> DSM5576 T   | <i>L. carnosum</i> | Correct         | <i>L. carnosum</i> |
| <i>L. carnosum</i> JB16        | <i>L. carnosum</i> | Correct         | <i>L. carnosum</i> |
| <i>L. carnosum</i> MFPA29A1405 | <i>L. carnosum</i> | Correct         | <i>L. carnosum</i> |
| <i>L. carnosum</i> MFPC16A2803 | <i>L. carnosum</i> | Correct         | <i>L. carnosum</i> |
| <i>L. carnosum</i> WC0318      | <i>L. carnosum</i> | Correct         | <i>L. carnosum</i> |
| <i>L. carnosum</i> WC0319      | <i>L. carnosum</i> | Correct         | <i>L. carnosum</i> |
| <i>L. carnosum</i> WC0320      | <i>L. carnosum</i> | Correct         | <i>L. carnosum</i> |
| <i>L. carnosum</i> WC0321      | <i>L. carnosum</i> | Correct         | <i>L. carnosum</i> |
| <i>L. carnosum</i> WC0322      | <i>L. carnosum</i> | Correct         | <i>L. carnosum</i> |
| <i>L. carnosum</i> WC0323      | <i>L. carnosum</i> | Correct         | <i>L. carnosum</i> |
| <i>L. carnosum</i> WC0324      | <i>L. carnosum</i> | Correct         | <i>L. carnosum</i> |
| <i>L. carnosum</i> WC0325      | <i>L. carnosum</i> | Correct         | <i>L. carnosum</i> |
| <i>L. carnosum</i> WC0326      | <i>L. carnosum</i> | Correct         | <i>L. carnosum</i> |
| <i>L. carnosum</i> WC0327      | <i>L. carnosum</i> | Correct         | <i>L. carnosum</i> |
| <i>L. carnosum</i> WC0328      | <i>L. carnosum</i> | Correct         | <i>L. carnosum</i> |
| <i>L. carnosum</i> WC0329      | <i>L. carnosum</i> | Correct         | <i>L. carnosum</i> |
| <i>L. citreum</i> 1301 LGAS    | <i>L. citreum</i>  | Correct         | <i>L. citreum</i>  |
| <i>L. citreum</i> CBA3621      | <i>L. citreum</i>  | Correct         | <i>L. citreum</i>  |
| <i>L. citreum</i> CBA3623      | <i>L. citreum</i>  | Correct         | <i>L. citreum</i>  |
| <i>L. citreum</i> CBA3624      | <i>L. citreum</i>  | Correct         | <i>L. citreum</i>  |
| <i>L. citreum</i> CBA3627      | <i>L. citreum</i>  | Correct         | <i>L. citreum</i>  |
| <i>L. citreum</i> CW28         | <i>L. citreum</i>  | Correct         | <i>L. citreum</i>  |
| <i>L. citreum</i> DmW 111      | <i>L. citreum</i>  | Correct         | <i>L. citreum</i>  |
| <i>L. citreum</i> EFEL 2700    | <i>L. citreum</i>  | Correct         | <i>L. citreum</i>  |
| <i>L. citreum</i> F192-5       | <i>L. citreum</i>  | Correct         | <i>L. citreum</i>  |
| <i>L. citreum</i> G4           | <i>L. citreum</i>  | Correct         | <i>L. citreum</i>  |
| <i>L. citreum</i> KM20         | <i>L. citreum</i>  | Correct         | <i>L. citreum</i>  |
| <i>L. citreum</i> LBAE C10     | <i>L. citreum</i>  | Correct         | <i>L. citreum</i>  |

|                                                                 |                                              |           |                          |
|-----------------------------------------------------------------|----------------------------------------------|-----------|--------------------------|
| <b><i>L. citreum</i> LBAE C11</b>                               | <i>L. citreum</i>                            | Correct   | <i>L. citreum</i>        |
| <b><i>L. citreum</i> LBAE E16</b>                               | <i>L. citreum</i>                            | Correct   | <i>L. citreum</i>        |
| <b><i>L. citreum</i> NBRC102476</b>                             | <i>L. citreum</i>                            | Correct   | <i>L. citreum</i>        |
| <b><i>L. citreum</i> NRIC1776 T</b>                             | <i>L. citreum</i>                            | Correct   | <i>L. citreum</i>        |
| <b><i>L. citreum</i> NRRL B-1299</b>                            | <i>L. citreum</i>                            | Correct   | <i>L. citreum</i>        |
| <b><i>L. citreum</i> NRRL B-742</b>                             | <i>L. citreum</i>                            | Correct   | <i>L. citreum</i>        |
| <b><i>L. citreum</i> TMW21194</b>                               | <i>L. citreum</i>                            | Correct   | <i>L. citreum</i>        |
| <b><i>L. citreum</i> TR116</b>                                  | <i>L. citreum</i>                            | Correct   | <i>L. citreum</i>        |
| <b><i>L. citreum</i> TR153</b>                                  | <i>L. citreum</i>                            | Correct   | <i>L. citreum</i>        |
| <b><i>L. citreum</i> WiKim0101</b>                              | <i>L. citreum</i>                            | Correct   | <i>L. citreum</i>        |
| <b><i>L. falkenbergense</i> LMG10779 T</b>                      | <i>L. falkenbergense</i>                     | Correct   | <i>L. falkenbergense</i> |
| <b><i>L. fallax</i> ATCC700006 T</b>                            | <i>L. fallax</i>                             | Correct   | <i>L. fallax</i>         |
| <b><i>L. gelidum</i> subsp <i>gasicomitatum</i> C120c</b>       | <i>L. gelidum</i> subsp <i>gasicomitatum</i> | Revisited | <i>L. inhae</i>          |
| <b><i>L. gelidum</i> subsp <i>gasicomitatum</i> C122c</b>       | <i>L. gelidum</i> subsp <i>gasicomitatum</i> | Revisited | <i>L. inhae</i>          |
| <b><i>L. gelidum</i> subsp <i>gasicomitatum</i> KG16-1</b>      | <i>L. gelidum</i> subsp <i>gasicomitatum</i> | Revisited | <i>L. inhae</i>          |
| <b><i>L. gelidum</i> subsp <i>gasicomitatum</i> KSL4-2</b>      | <i>L. gelidum</i> subsp <i>gasicomitatum</i> | Revisited | <i>L. inhae</i>          |
| <b><i>L. gelidum</i> subsp <i>gasicomitatum</i> LMG18811 T</b>  | <i>L. gelidum</i> subsp <i>gasicomitatum</i> | Revisited | <i>L. inhae</i>          |
| <b><i>L. gelidum</i> subsp <i>gasicomitatum</i> MFPA44A1401</b> | <i>L. gelidum</i> subsp <i>gasicomitatum</i> | Revisited | <i>L. inhae</i>          |
| <b><i>L. gelidum</i> subsp <i>gasicomitatum</i> PB1a</b>        | <i>L. gelidum</i> subsp <i>gasicomitatum</i> | Revisited | <i>L. inhae</i>          |
| <b><i>L. gelidum</i> subsp <i>gasicomitatum</i> PB1e</b>        | <i>L. gelidum</i> subsp <i>gasicomitatum</i> | Revisited | <i>L. inhae</i>          |
| <b><i>L. gelidum</i> subsp <i>gasicomitatum</i> PL111</b>       | <i>L. gelidum</i> subsp <i>gasicomitatum</i> | Revisited | <i>L. inhae</i>          |
| <b><i>L. gelidum</i> subsp <i>gasicomitatum</i> TMW 2.1619</b>  | <i>L. gelidum</i> subsp <i>gasicomitatum</i> | Revisited | <i>L. inhae</i>          |
| <b><i>L. gelidum</i> subsp <i>gelidum</i> JB7</b>               | <i>L. gelidum</i> subsp <i>gelidum</i>       | Correct   | <i>L. gelidum</i>        |
| <b><i>L. gelidum</i> subsp <i>gelidum</i> KCTC3527 T</b>        | <i>L. gelidum</i> subsp <i>gelidum</i>       | Correct   | <i>L. gelidum</i>        |
| <b><i>L. holzapfelii</i> CCUG54536 T</b>                        | <i>L. holzapfelii</i>                        | Correct   | <i>L. holzapfelii</i>    |
| <b><i>L. inhae</i> KCTC3774 T</b>                               | <i>L. inhae</i>                              | Correct   | <i>L. inhae</i>          |
| <b><i>L. kimchii</i> C2</b>                                     | <i>L. kimchii</i>                            | Correct   | <i>L. kimchii</i>        |
| <b><i>L. kimchii</i> IMSNU11154 T</b>                           | <i>L. kimchii</i>                            | Correct   | <i>L. kimchii</i>        |
| <b><i>L. kimchii</i> NKJ218</b>                                 | <i>L. kimchii</i>                            | Correct   | <i>L. kimchii</i>        |
| <b><i>L. lactis</i> 1300 LCIT</b>                               | <i>L. lactis</i>                             | Revisited | GS2                      |
| <b><i>L. lactis</i> aa 0143</b>                                 | <i>L. lactis</i>                             | Revisited | GS2                      |
| <b><i>L. lactis</i> BIOML-A1</b>                                | <i>L. lactis</i>                             | Revisited | GS2                      |
| <b><i>L. lactis</i> CBA3625</b>                                 | <i>L. lactis</i>                             | Revisited | GS2                      |
| <b><i>L. lactis</i> CBA3626</b>                                 | <i>L. lactis</i>                             | Revisited | GS2                      |

|                                                                    |                         |           |                         |
|--------------------------------------------------------------------|-------------------------|-----------|-------------------------|
| <b><i>L. lactis</i> CCK940</b>                                     | <i>L. lactis</i>        | Revisited | GS2                     |
| <b><i>L. lactis</i> KACC91922</b>                                  | <i>L. lactis</i>        | Revisited | GS2                     |
| <b><i>L. lactis</i> KCTC3773</b>                                   | <i>L. lactis</i>        | Revisited | GS1                     |
| <b><i>L. lactis</i> KFRI01</b>                                     | <i>L. lactis</i>        | Revisited | GS2                     |
| <b><i>L. lactis</i> LN19</b>                                       | <i>L. lactis</i>        | Revisited | GS1                     |
| <b><i>L. lactis</i> LN24</b>                                       | <i>L. lactis</i>        | Revisited | GS1                     |
| <b><i>L. lactis</i> NBRC 12455</b>                                 | <i>L. lactis</i>        | Revisited | GS2                     |
| <b><i>L. lactis</i> WiKim40</b>                                    | <i>L. lactis</i>        | Revisited | GS2                     |
| <b><i>L. litchii</i> MB7 T</b>                                     | <i>L. litchii</i>       | Correct   | <i>L. litchii</i>       |
| <b><i>L. mesenteroides</i> CBA3628</b>                             | <i>L. mesenteroides</i> | Revisited | GS3                     |
| <b><i>L. mesenteroides</i> subsp <i>cremoris</i> ATCC19254 T</b>   | <i>L. mesenteroides</i> | Correct   | <i>L. mesenteroides</i> |
| <b><i>L. mesenteroides</i> subsp <i>cremoris</i> LMGCF01</b>       | <i>L. mesenteroides</i> | Correct   | <i>L. mesenteroides</i> |
| <b><i>L. mesenteroides</i> subsp <i>cremoris</i> LMGCF02</b>       | <i>L. mesenteroides</i> | Correct   | <i>L. mesenteroides</i> |
| <b><i>L. mesenteroides</i> subsp <i>cremoris</i> LMGCF03</b>       | <i>L. mesenteroides</i> | Correct   | <i>L. mesenteroides</i> |
| <b><i>L. mesenteroides</i> subsp <i>cremoris</i> LMGCF04</b>       | <i>L. mesenteroides</i> | Correct   | <i>L. mesenteroides</i> |
| <b><i>L. mesenteroides</i> subsp <i>cremoris</i> LMGCF05</b>       | <i>L. mesenteroides</i> | Correct   | <i>L. mesenteroides</i> |
| <b><i>L. mesenteroides</i> subsp <i>cremoris</i> LMGCF07</b>       | <i>L. mesenteroides</i> | Correct   | <i>L. mesenteroides</i> |
| <b><i>L. mesenteroides</i> subsp <i>cremoris</i> LMGCF09</b>       | <i>L. mesenteroides</i> | Correct   | <i>L. mesenteroides</i> |
| <b><i>L. mesenteroides</i> subsp <i>cremoris</i> LMGCF10</b>       | <i>L. mesenteroides</i> | Correct   | <i>L. mesenteroides</i> |
| <b><i>L. mesenteroides</i> subsp <i>cremoris</i> LMGCF11</b>       | <i>L. mesenteroides</i> | Correct   | <i>L. mesenteroides</i> |
| <b><i>L. mesenteroides</i> subsp <i>cremoris</i> LMGCF12</b>       | <i>L. mesenteroides</i> | Correct   | <i>L. mesenteroides</i> |
| <b><i>L. mesenteroides</i> subsp <i>cremoris</i> LMGCF13</b>       | <i>L. mesenteroides</i> | Correct   | <i>L. mesenteroides</i> |
| <b><i>L. mesenteroides</i> subsp <i>cremoris</i> LMGCF14</b>       | <i>L. mesenteroides</i> | Correct   | <i>L. mesenteroides</i> |
| <b><i>L. mesenteroides</i> subsp <i>cremoris</i> LMGCF16</b>       | <i>L. mesenteroides</i> | Correct   | <i>L. mesenteroides</i> |
| <b><i>L. mesenteroides</i> subsp <i>cremoris</i> LMGCF17</b>       | <i>L. mesenteroides</i> | Correct   | <i>L. mesenteroides</i> |
| <b><i>L. mesenteroides</i> subsp <i>cremoris</i> LMGCF18</b>       | <i>L. mesenteroides</i> | Correct   | <i>L. mesenteroides</i> |
| <b><i>L. mesenteroides</i> subsp <i>cremoris</i> LMGCF19</b>       | <i>L. mesenteroides</i> | Correct   | <i>L. mesenteroides</i> |
| <b><i>L. mesenteroides</i> subsp <i>cremoris</i> LMGCF20</b>       | <i>L. mesenteroides</i> | Correct   | <i>L. mesenteroides</i> |
| <b><i>L. mesenteroides</i> subsp <i>cremoris</i> LN07</b>          | <i>L. mesenteroides</i> | Correct   | <i>L. mesenteroides</i> |
| <b><i>L. mesenteroides</i> subsp <i>cremoris</i> T26</b>           | <i>L. mesenteroides</i> | Correct   | <i>L. mesenteroides</i> |
| <b><i>L. mesenteroides</i> subsp <i>cremoris</i> TIFN8</b>         | <i>L. mesenteroides</i> | Correct   | <i>L. mesenteroides</i> |
| <b><i>L. mesenteroides</i> subsp <i>dextranicum</i> DSM20484 T</b> | <i>L. mesenteroides</i> | Correct   | <i>L. mesenteroides</i> |
| <b><i>L. mesenteroides</i> subsp <i>dextranicum</i> FAM 18356</b>  | <i>L. mesenteroides</i> | Correct   | <i>L. mesenteroides</i> |
| <b><i>L. mesenteroides</i> subsp <i>dextranicum</i> FM06</b>       | <i>L. mesenteroides</i> | Correct   | <i>L. mesenteroides</i> |

|                                                                         |                         |           |                         |
|-------------------------------------------------------------------------|-------------------------|-----------|-------------------------|
| <b><i>L. mesenteroides</i> subsp <i>dextranicum</i> LbT16</b>           | <i>L. mesenteroides</i> | Correct   | <i>L. mesenteroides</i> |
| <b><i>L. mesenteroides</i> subsp <i>dextranicum</i> LN05</b>            | <i>L. mesenteroides</i> | Correct   | <i>L. mesenteroides</i> |
| <b><i>L. mesenteroides</i> subsp <i>dextranicum</i> LN08</b>            | <i>L. mesenteroides</i> | Correct   | <i>L. mesenteroides</i> |
| <b><i>L. mesenteroides</i> subsp <i>dextranicum</i> LN32</b>            | <i>L. mesenteroides</i> | Correct   | <i>L. mesenteroides</i> |
| <b><i>L. mesenteroides</i> subsp <i>dextranicum</i> LN34</b>            | <i>L. mesenteroides</i> | Correct   | <i>L. mesenteroides</i> |
| <b><i>L. mesenteroides</i> subsp <i>dextranicum</i> NCTC10817</b>       | <i>L. mesenteroides</i> | Correct   | <i>L. mesenteroides</i> |
| <b><i>L. mesenteroides</i> subsp <i>dextranicum</i> OG2</b>             | <i>L. mesenteroides</i> | Correct   | <i>L. mesenteroides</i> |
| <b><i>L. mesenteroides</i> subsp <i>dextranicum</i> P45</b>             | <i>L. mesenteroides</i> | Correct   | <i>L. mesenteroides</i> |
| <b><i>L. mesenteroides</i> subsp <i>dextranicum</i> WC0331</b>          | <i>L. mesenteroides</i> | Correct   | <i>L. mesenteroides</i> |
| <b><i>L. mesenteroides</i> subsp <i>jonggajibkimchii</i> B5</b>         | <i>L. mesenteroides</i> | Correct   | <i>L. mesenteroides</i> |
| <b><i>L. mesenteroides</i> subsp <i>jonggajibkimchii</i> BD3749</b>     | <i>L. mesenteroides</i> | Correct   | <i>L. mesenteroides</i> |
| <b><i>L. mesenteroides</i> subsp <i>jonggajibkimchii</i> CBA7131</b>    | <i>L. mesenteroides</i> | Correct   | <i>L. mesenteroides</i> |
| <b><i>L. mesenteroides</i> subsp <i>jonggajibkimchii</i> DRC1506 T</b>  | <i>L. mesenteroides</i> | Correct   | <i>L. mesenteroides</i> |
| <b><i>L. mesenteroides</i> subsp <i>jonggajibkimchii</i> KFRI-MG</b>    | <i>L. mesenteroides</i> | Correct   | <i>L. mesenteroides</i> |
| <b><i>L. mesenteroides</i> subsp <i>jonggajibkimchii</i> KIBGE-IB22</b> | <i>L. mesenteroides</i> | Correct   | <i>L. mesenteroides</i> |
| <b><i>L. mesenteroides</i> subsp <i>jonggajibkimchii</i> SRCM102735</b> | <i>L. mesenteroides</i> | Correct   | <i>L. mesenteroides</i> |
| <b><i>L. mesenteroides</i> subsp <i>jonggajibkimchii</i> SRCM103356</b> | <i>L. mesenteroides</i> | Correct   | <i>L. mesenteroides</i> |
| <b><i>L. mesenteroides</i> subsp <i>jonggajibkimchii</i> SRCM103453</b> | <i>L. mesenteroides</i> | Correct   | <i>L. mesenteroides</i> |
| <b><i>L. mesenteroides</i> subsp <i>jonggajibkimchii</i> SRCM103460</b> | <i>L. mesenteroides</i> | Correct   | <i>L. mesenteroides</i> |
| <b><i>L. mesenteroides</i> subsp <i>jonggajibkimchii</i> WC0333</b>     | <i>L. mesenteroides</i> | Correct   | <i>L. mesenteroides</i> |
| <b><i>L. mesenteroides</i> subsp <i>jonggajibkimchii</i> WiKim33</b>    | <i>L. mesenteroides</i> | Correct   | <i>L. mesenteroides</i> |
| <b><i>L. mesenteroides</i> subsp <i>mesenteroides</i> CBA3607</b>       | <i>L. mesenteroides</i> | Revisited | GS3                     |
| <b><i>L. mesenteroides</i> subsp <i>mesenteroides</i> 213M0</b>         | <i>L. mesenteroides</i> | Correct   | <i>L. mesenteroides</i> |
| <b><i>L. mesenteroides</i> subsp <i>mesenteroides</i> 406</b>           | <i>L. mesenteroides</i> | Correct   | <i>L. mesenteroides</i> |
| <b><i>L. mesenteroides</i> subsp <i>mesenteroides</i> ATCC8293 T</b>    | <i>L. mesenteroides</i> | Correct   | <i>L. mesenteroides</i> |
| <b><i>L. mesenteroides</i> subsp <i>mesenteroides</i> AtHG50</b>        | <i>L. mesenteroides</i> | Correct   | <i>L. mesenteroides</i> |
| <b><i>L. mesenteroides</i> subsp <i>mesenteroides</i> BD1710</b>        | <i>L. mesenteroides</i> | Correct   | <i>L. mesenteroides</i> |
| <b><i>L. mesenteroides</i> subsp <i>mesenteroides</i> CECT9217</b>      | <i>L. mesenteroides</i> | Correct   | <i>L. mesenteroides</i> |
| <b><i>L. mesenteroides</i> subsp <i>mesenteroides</i> CECT9266</b>      | <i>L. mesenteroides</i> | Correct   | <i>L. mesenteroides</i> |
| <b><i>L. mesenteroides</i> subsp <i>mesenteroides</i> CECT9268</b>      | <i>L. mesenteroides</i> | Correct   | <i>L. mesenteroides</i> |
| <b><i>L. mesenteroides</i> subsp <i>mesenteroides</i> DE0394</b>        | <i>L. mesenteroides</i> | Correct   | <i>L. mesenteroides</i> |
| <b><i>L. mesenteroides</i> subsp <i>mesenteroides</i> DRC0211</b>       | <i>L. mesenteroides</i> | Correct   | <i>L. mesenteroides</i> |
| <b><i>L. mesenteroides</i> subsp <i>mesenteroides</i> GL1</b>           | <i>L. mesenteroides</i> | Correct   | <i>L. mesenteroides</i> |
| <b><i>L. mesenteroides</i> subsp <i>mesenteroides</i> J18</b>           | <i>L. mesenteroides</i> | Correct   | <i>L. mesenteroides</i> |

|                                                                      |                               |           |                               |
|----------------------------------------------------------------------|-------------------------------|-----------|-------------------------------|
| <b><i>L. mesenteroides</i> subsp <i>mesenteroides</i> KMB608</b>     | <i>L. mesenteroides</i>       | Correct   | <i>L. mesenteroides</i>       |
| <b><i>L. mesenteroides</i> subsp <i>mesenteroides</i> KMB609</b>     | <i>L. mesenteroides</i>       | Correct   | <i>L. mesenteroides</i>       |
| <b><i>L. mesenteroides</i> subsp <i>mesenteroides</i> KMB611</b>     | <i>L. mesenteroides</i>       | Correct   | <i>L. mesenteroides</i>       |
| <b><i>L. mesenteroides</i> subsp <i>mesenteroides</i> LbE15</b>      | <i>L. mesenteroides</i>       | Correct   | <i>L. mesenteroides</i>       |
| <b><i>L. mesenteroides</i> subsp <i>mesenteroides</i> LbE16</b>      | <i>L. mesenteroides</i>       | Correct   | <i>L. mesenteroides</i>       |
| <b><i>L. mesenteroides</i> subsp <i>mesenteroides</i> LK-151</b>     | <i>L. mesenteroides</i>       | Correct   | <i>L. mesenteroides</i>       |
| <b><i>L. mesenteroides</i> subsp <i>mesenteroides</i> LN25</b>       | <i>L. mesenteroides</i>       | Correct   | <i>L. mesenteroides</i>       |
| <b><i>L. mesenteroides</i> subsp <i>mesenteroides</i> LN27</b>       | <i>L. mesenteroides</i>       | Correct   | <i>L. mesenteroides</i>       |
| <b><i>L. mesenteroides</i> subsp <i>mesenteroides</i> M11</b>        | <i>L. mesenteroides</i>       | Correct   | <i>L. mesenteroides</i>       |
| <b><i>L. mesenteroides</i> subsp <i>mesenteroides</i> NBRC102481</b> | <i>L. mesenteroides</i>       | Correct   | <i>L. mesenteroides</i>       |
| <b><i>L. mesenteroides</i> subsp <i>mesenteroides</i> NBRC3832</b>   | <i>L. mesenteroides</i>       | Correct   | <i>L. mesenteroides</i>       |
| <b><i>L. mesenteroides</i> subsp <i>mesenteroides</i> SRCM102733</b> | <i>L. mesenteroides</i>       | Correct   | <i>L. mesenteroides</i>       |
| <b><i>L. mesenteroides</i> subsp <i>mesenteroides</i> TR154</b>      | <i>L. mesenteroides</i>       | Correct   | <i>L. mesenteroides</i>       |
| <b><i>L. mesenteroides</i> subsp <i>mesenteroides</i> WC0330</b>     | <i>L. mesenteroides</i>       | Correct   | <i>L. mesenteroides</i>       |
| <b><i>L. mesenteroides</i> subsp <i>mesenteroides</i> WC0332</b>     | <i>L. mesenteroides</i>       | Correct   | <i>L. mesenteroides</i>       |
| <b><i>L. mesenteroides</i> subsp <i>mesenteroides</i> Wikim17</b>    | <i>L. mesenteroides</i>       | Correct   | <i>L. mesenteroides</i>       |
| <b><i>L. mesenteroides</i> subsp <i>mesenteroides</i> YL48</b>       | <i>L. mesenteroides</i>       | Correct   | <i>L. mesenteroides</i>       |
| <b><i>L. pseudomesenteroides</i>1159</b>                             | <i>L. pseudomesenteroides</i> | Revisited | <i>L. falkenbergense</i>      |
| <b><i>L. pseudomesenteroides</i> 4882</b>                            | <i>L. pseudomesenteroides</i> | Revisited | <i>L. falkenbergense</i>      |
| <b><i>L. pseudomesenteroides</i> AMBR10</b>                          | <i>L. pseudomesenteroides</i> | Revisited | <i>L. falkenbergense</i>      |
| <b><i>L. pseudomesenteroides</i> BM2</b>                             | <i>L. pseudomesenteroides</i> | Revisited | <i>L. falkenbergense</i>      |
| <b><i>L. pseudomesenteroides</i> CBA3630</b>                         | <i>L. pseudomesenteroides</i> | Correct   | <i>L. pseudomesenteroides</i> |
| <b><i>L. pseudomesenteroides</i> HPK01</b>                           | <i>L. pseudomesenteroides</i> | Revisited | <i>L. falkenbergense</i>      |
| <b><i>L. pseudomesenteroides</i> KMB610</b>                          | <i>L. pseudomesenteroides</i> | Revisited | <i>L. falkenbergense</i>      |
| <b><i>L. pseudomesenteroides</i> LMG11482 T</b>                      | <i>L. pseudomesenteroides</i> | Correct   | <i>L. pseudomesenteroides</i> |
| <b><i>L. pseudomesenteroides</i> LMGCF06</b>                         | <i>L. pseudomesenteroides</i> | Revisited | <i>L. falkenbergense</i>      |
| <b><i>L. pseudomesenteroides</i> LMGCF08</b>                         | <i>L. pseudomesenteroides</i> | Revisited | <i>L. falkenbergense</i>      |
| <b><i>L. pseudomesenteroides</i> LMGCF15</b>                         | <i>L. pseudomesenteroides</i> | Revisited | <i>L. falkenbergense</i>      |
| <b><i>L. pseudomesenteroides</i> LMGH100</b>                         | <i>L. pseudomesenteroides</i> | Revisited | <i>L. falkenbergense</i>      |
| <b><i>L. pseudomesenteroides</i> LMGH278</b>                         | <i>L. pseudomesenteroides</i> | Revisited | <i>L. falkenbergense</i>      |
| <b><i>L. pseudomesenteroides</i> LMGH280</b>                         | <i>L. pseudomesenteroides</i> | Revisited | <i>L. falkenbergense</i>      |
| <b><i>L. pseudomesenteroides</i> LMGH284</b>                         | <i>L. pseudomesenteroides</i> | Revisited | <i>L. falkenbergense</i>      |
| <b><i>L. pseudomesenteroides</i> LMGH61</b>                          | <i>L. pseudomesenteroides</i> | Revisited | <i>L. falkenbergense</i>      |
| <b><i>L. pseudomesenteroides</i> LMGH83</b>                          | <i>L. pseudomesenteroides</i> | Revisited | <i>L. falkenbergense</i>      |

|                                                      |                               |           |                               |
|------------------------------------------------------|-------------------------------|-----------|-------------------------------|
| <b><i>L. pseudomesenteroides</i> LMGH95</b>          | <i>L. pseudomesenteroides</i> | Revisited | <i>L. falckenbergense</i>     |
| <b><i>L. pseudomesenteroides</i> LMGH97</b>          | <i>L. pseudomesenteroides</i> | Revisited | <i>L. falckenbergense</i>     |
| <b><i>L. pseudomesenteroides</i> LMGTW1</b>          | <i>L. pseudomesenteroides</i> | Revisited | <i>L. falckenbergense</i>     |
| <b><i>L. pseudomesenteroides</i> LMGTW3</b>          | <i>L. pseudomesenteroides</i> | Revisited | <i>L. falckenbergense</i>     |
| <b><i>L. pseudomesenteroides</i> LMGTW6</b>          | <i>L. pseudomesenteroides</i> | Revisited | <i>L. falckenbergense</i>     |
| <b><i>L. pseudomesenteroides</i> LMGTW8</b>          | <i>L. pseudomesenteroides</i> | Revisited | <i>L. falckenbergense</i>     |
| <b><i>L. pseudomesenteroides</i> LN02</b>            | <i>L. pseudomesenteroides</i> | Revisited | <i>L. falckenbergense</i>     |
| <b><i>L. pseudomesenteroides</i> LN12</b>            | <i>L. pseudomesenteroides</i> | Revisited | <i>L. falckenbergense</i>     |
| <b><i>L. pseudomesenteroides</i> LN23</b>            | <i>L. pseudomesenteroides</i> | Revisited | <i>L. falckenbergense</i>     |
| <b><i>L. pseudomesenteroides</i> MGYG-HGUT-00096</b> | <i>L. pseudomesenteroides</i> | Correct   | <i>L. pseudomesenteroides</i> |
| <b><i>L. pseudomesenteroides</i> PS12</b>            | <i>L. pseudomesenteroides</i> | Revisited | <i>L. falckenbergense</i>     |
| <b><i>L. pseudomesenteroides</i> TR070</b>           | <i>L. pseudomesenteroides</i> | Correct   | <i>L. pseudomesenteroides</i> |
| <b><i>L. rapi</i> DSM27776 T</b>                     | <i>L. rapi</i>                | Correct   | <i>L. rapi</i>                |
| <b><i>L. suionicum</i> CECT 8486</b>                 | <i>L. suionicum</i>           | Correct   | <i>L. suionicum</i>           |
| <b><i>L. suionicum</i> CECT 9216</b>                 | <i>L. suionicum</i>           | Correct   | <i>L. suionicum</i>           |
| <b><i>L. suionicum</i> CECT8484</b>                  | <i>L. suionicum</i>           | Correct   | <i>L. suionicum</i>           |
| <b><i>L. suionicum</i> DSM20241 T</b>                | <i>L. suionicum</i>           | Correct   | <i>L. suionicum</i>           |



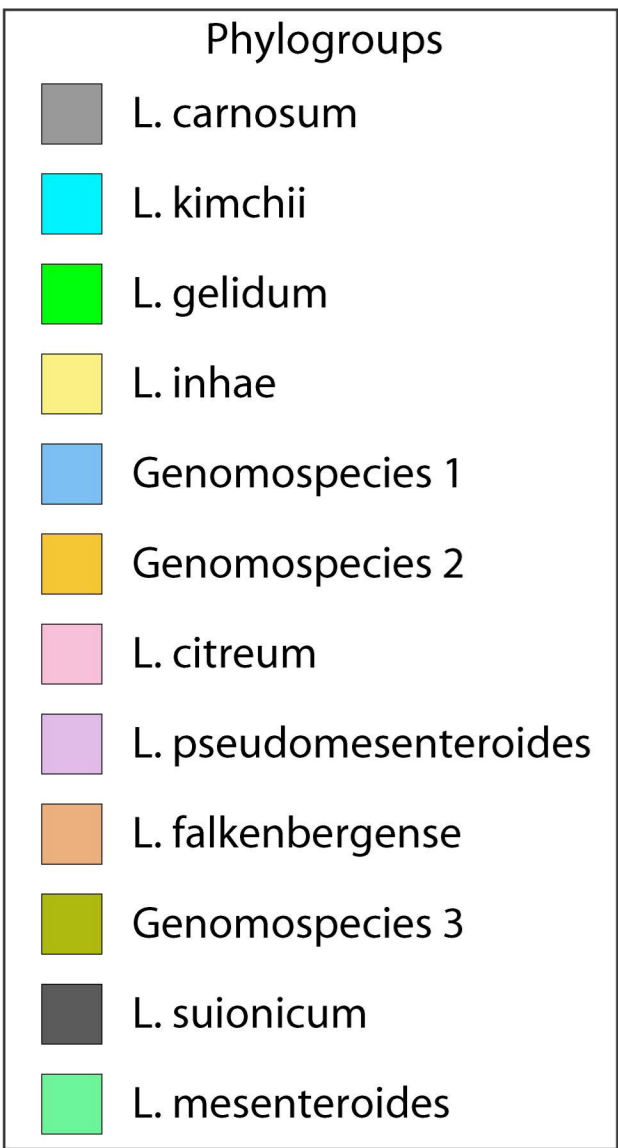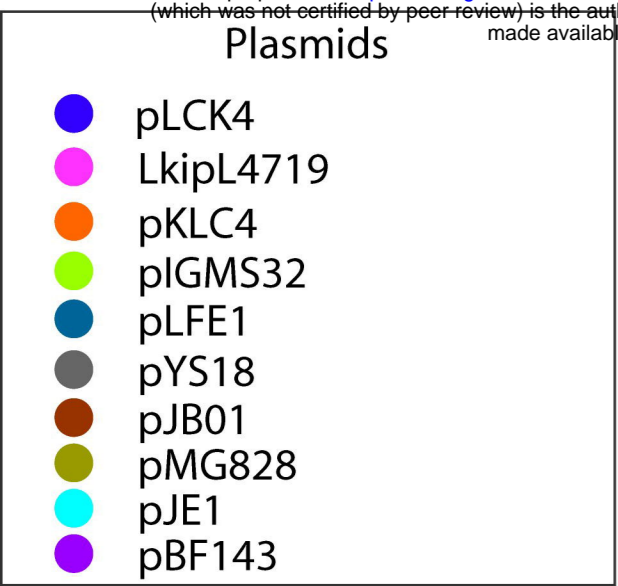

bioRxiv preprint doi: <https://doi.org/10.1101/2021.07.20.453025>; this version posted July 20, 2021. The copyright holder for this preprint (which was not certified by peer review) is the author/funder, who has granted bioRxiv a license to display the preprint in perpetuity. It is made available under aCC-BY-NC-ND 4.0 International license.

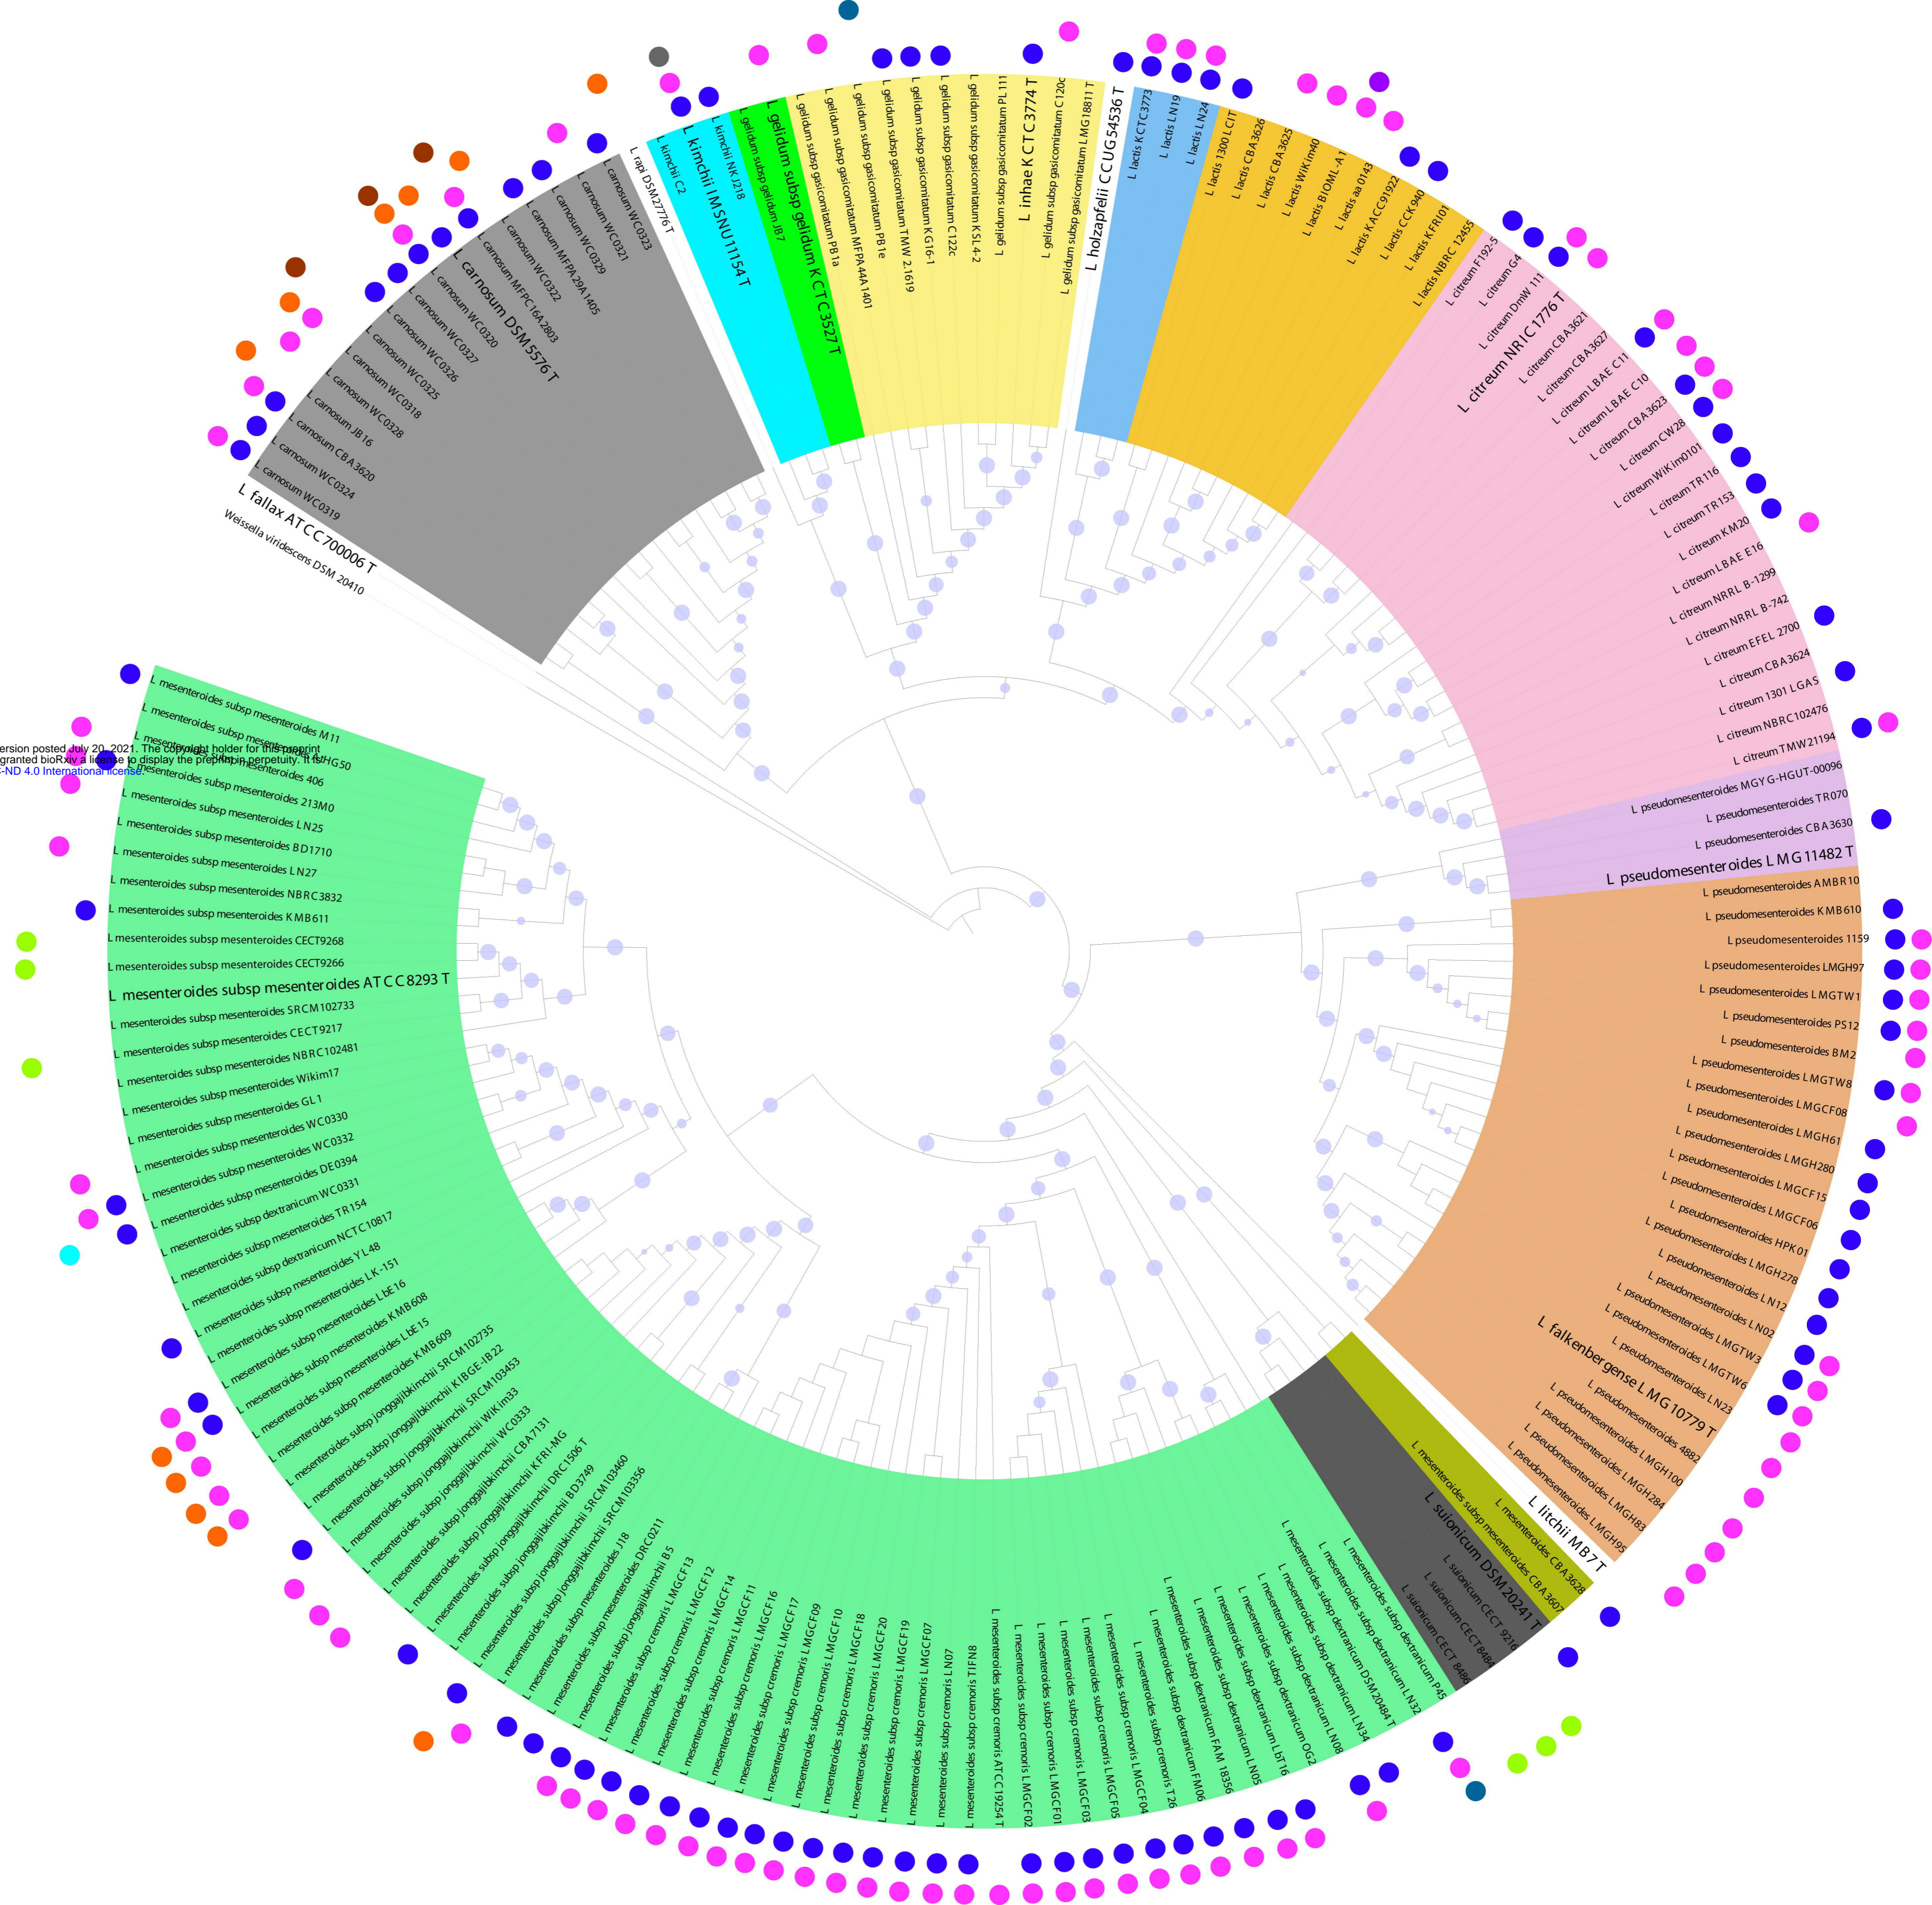



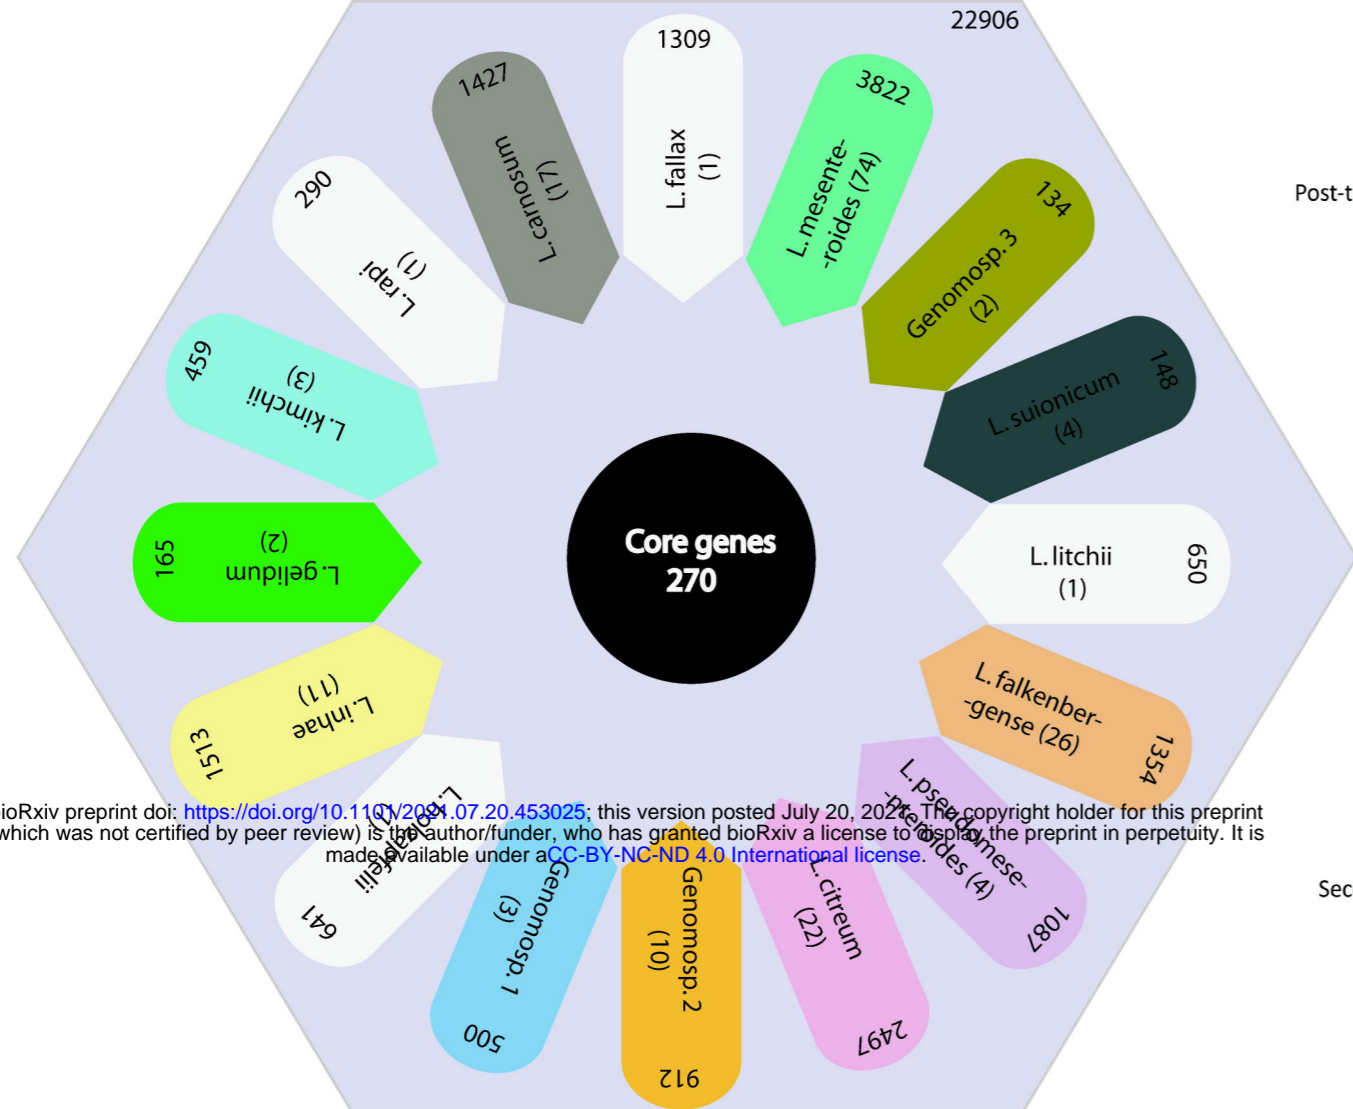

bioRxiv preprint doi: <https://doi.org/10.1101/2024.07.20.453025>; this version posted July 20, 2024. The copyright holder for this preprint (which was not certified by peer review) is the author/funder, who has granted bioRxiv a license to display the preprint in perpetuity. It is made available under aCC-BY-NC-ND 4.0 International license.

(A)

Cell cycle control, cell division, chromosome partitioning (D)  
 Cell wall/membrane/envelope biogenesis (M)  
 Post-translational modification, protein turnover, and chaperones (O)  
 Signal transduction mechanisms (T)  
 Intracellular trafficking, secretion, and vesicular transport (U)  
 Translation, ribosomal structure and biogenesis (J)  
 Transcription (K)  
 Replication, recombination and repair (L)  
 Energy production and conversion (C)  
 Amino acid transport and metabolism (E)  
 Nucleotide transport and metabolism (F)  
 Carbohydrate transport and metabolism (G)  
 Coenzyme transport and metabolism (H)  
 Lipid transport and metabolism (I)  
 Inorganic ion transport and metabolism (P)  
 Secondary metabolites biosynthesis, transport, and catabolism (Q)  
 Function unknown (S)

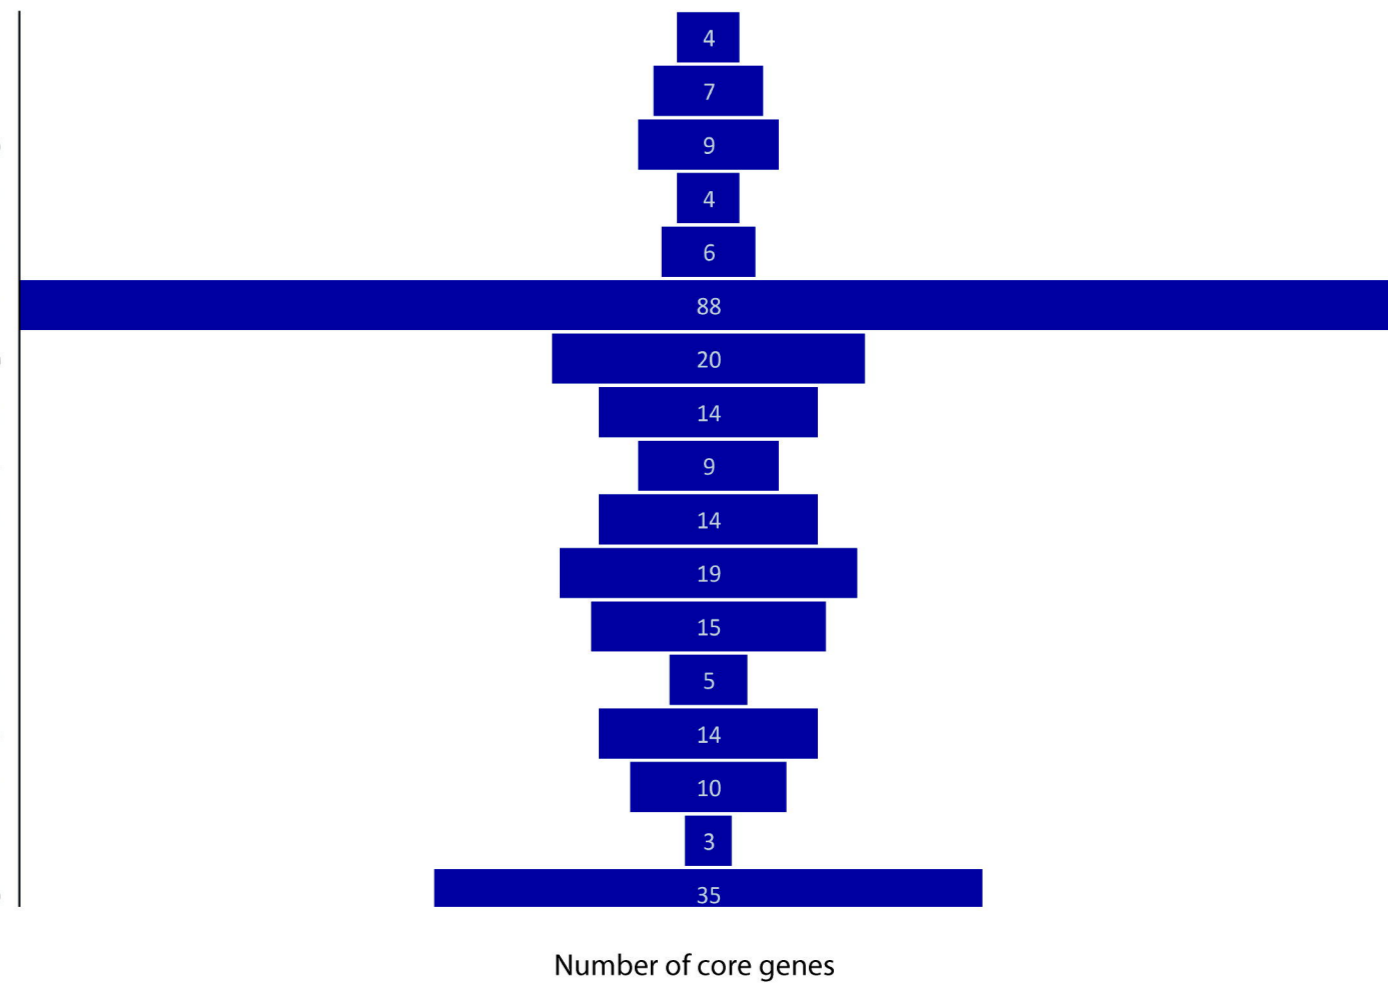

(B)

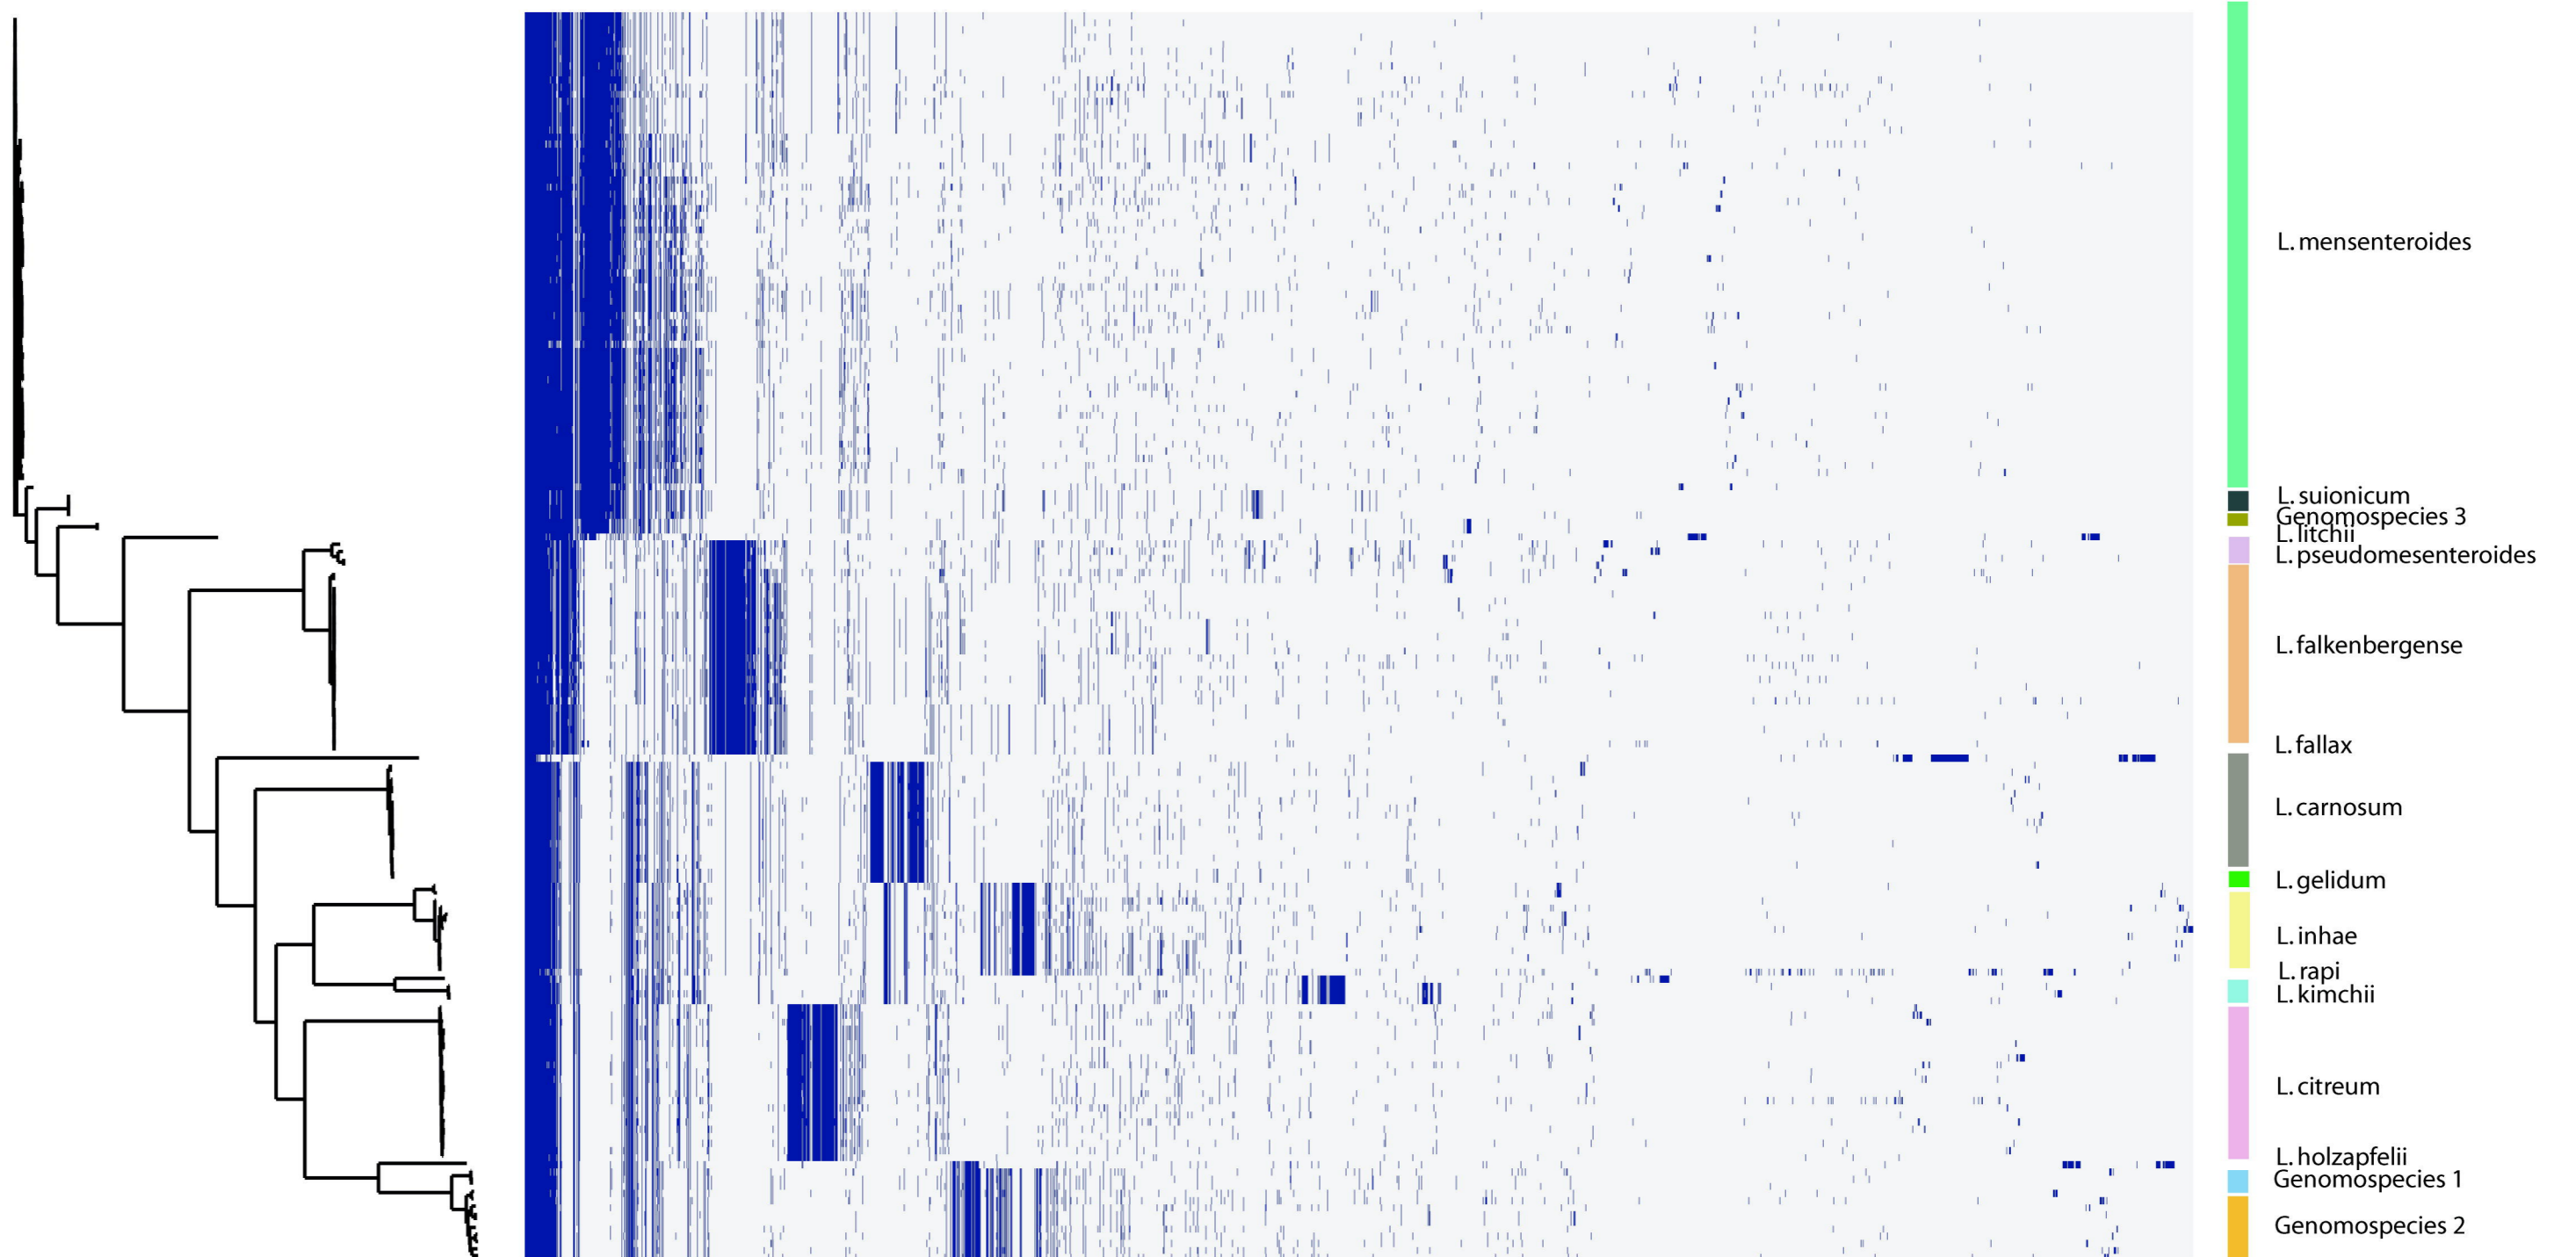

(C)

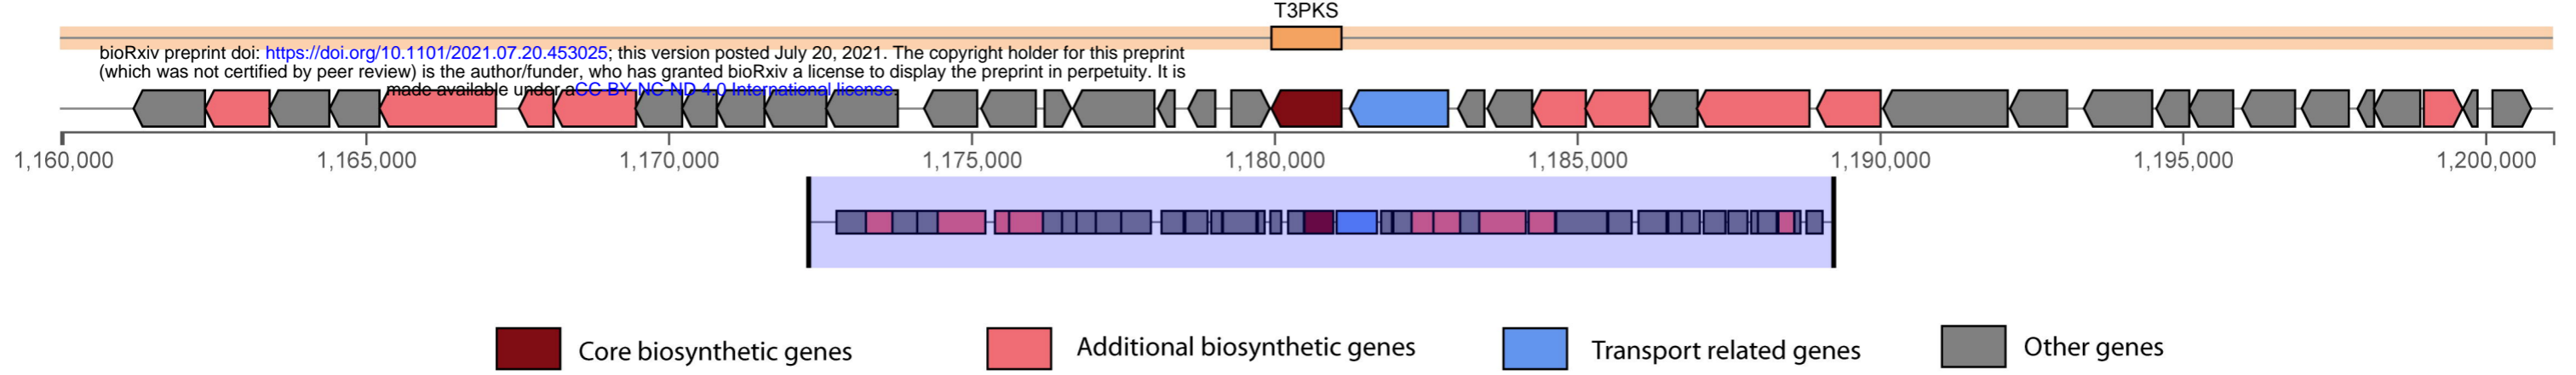

(A)

row min row max

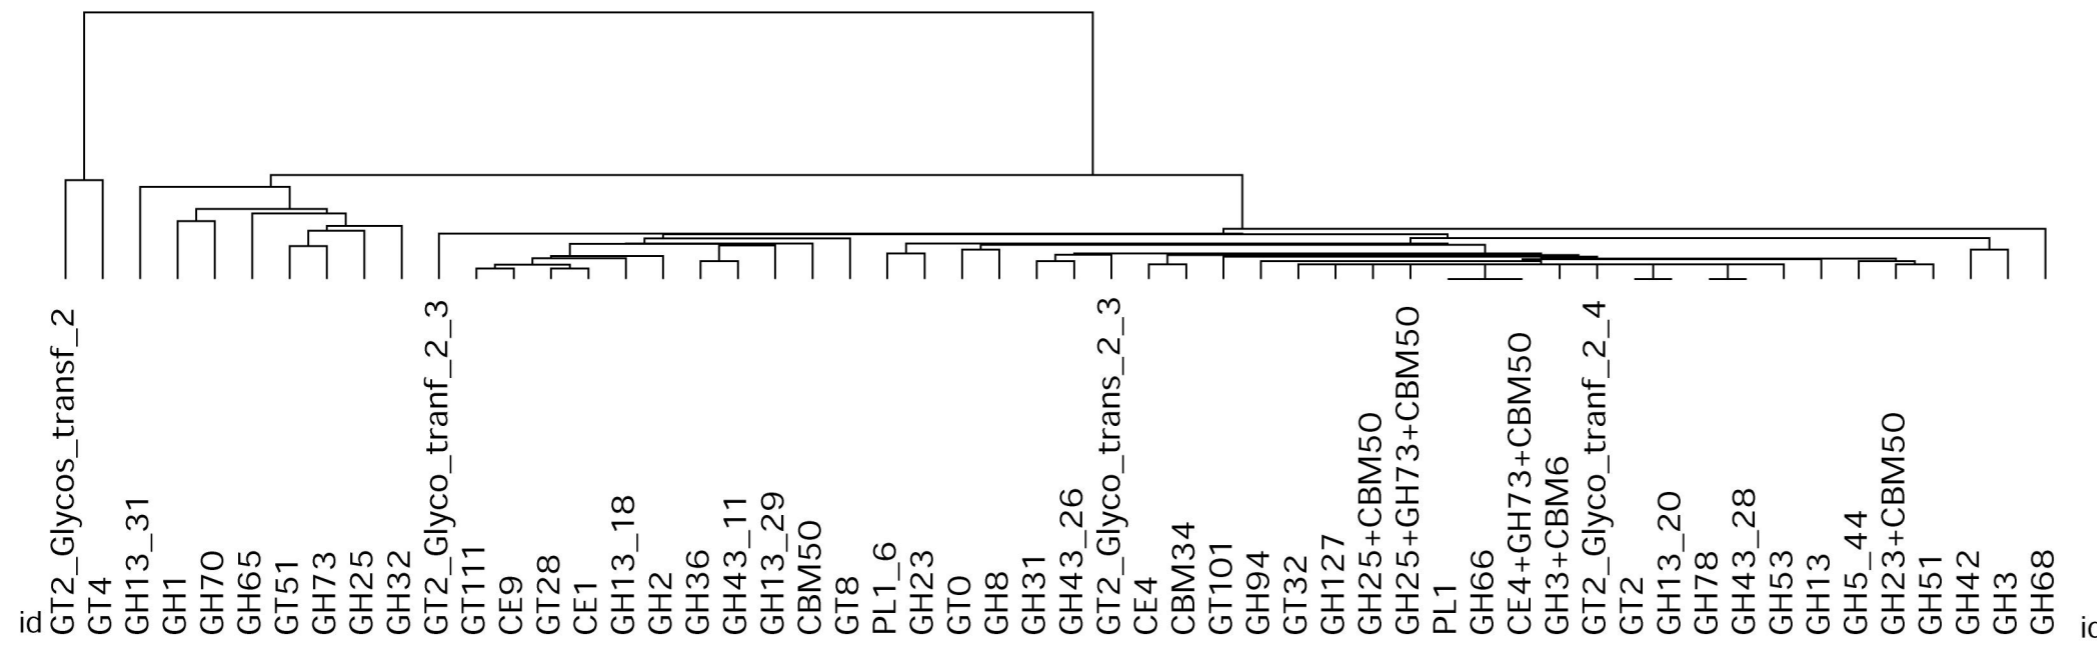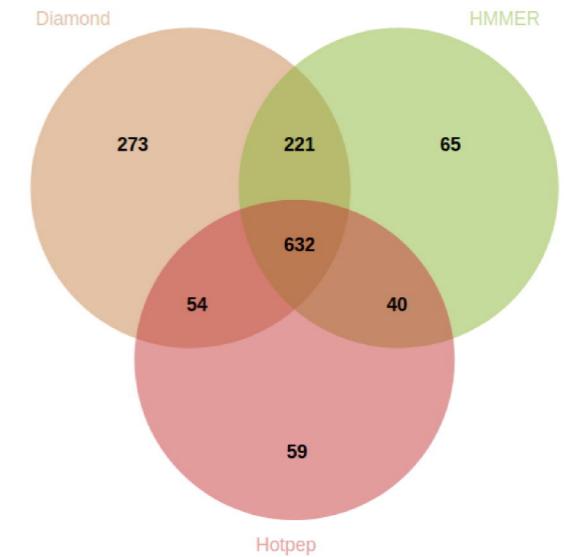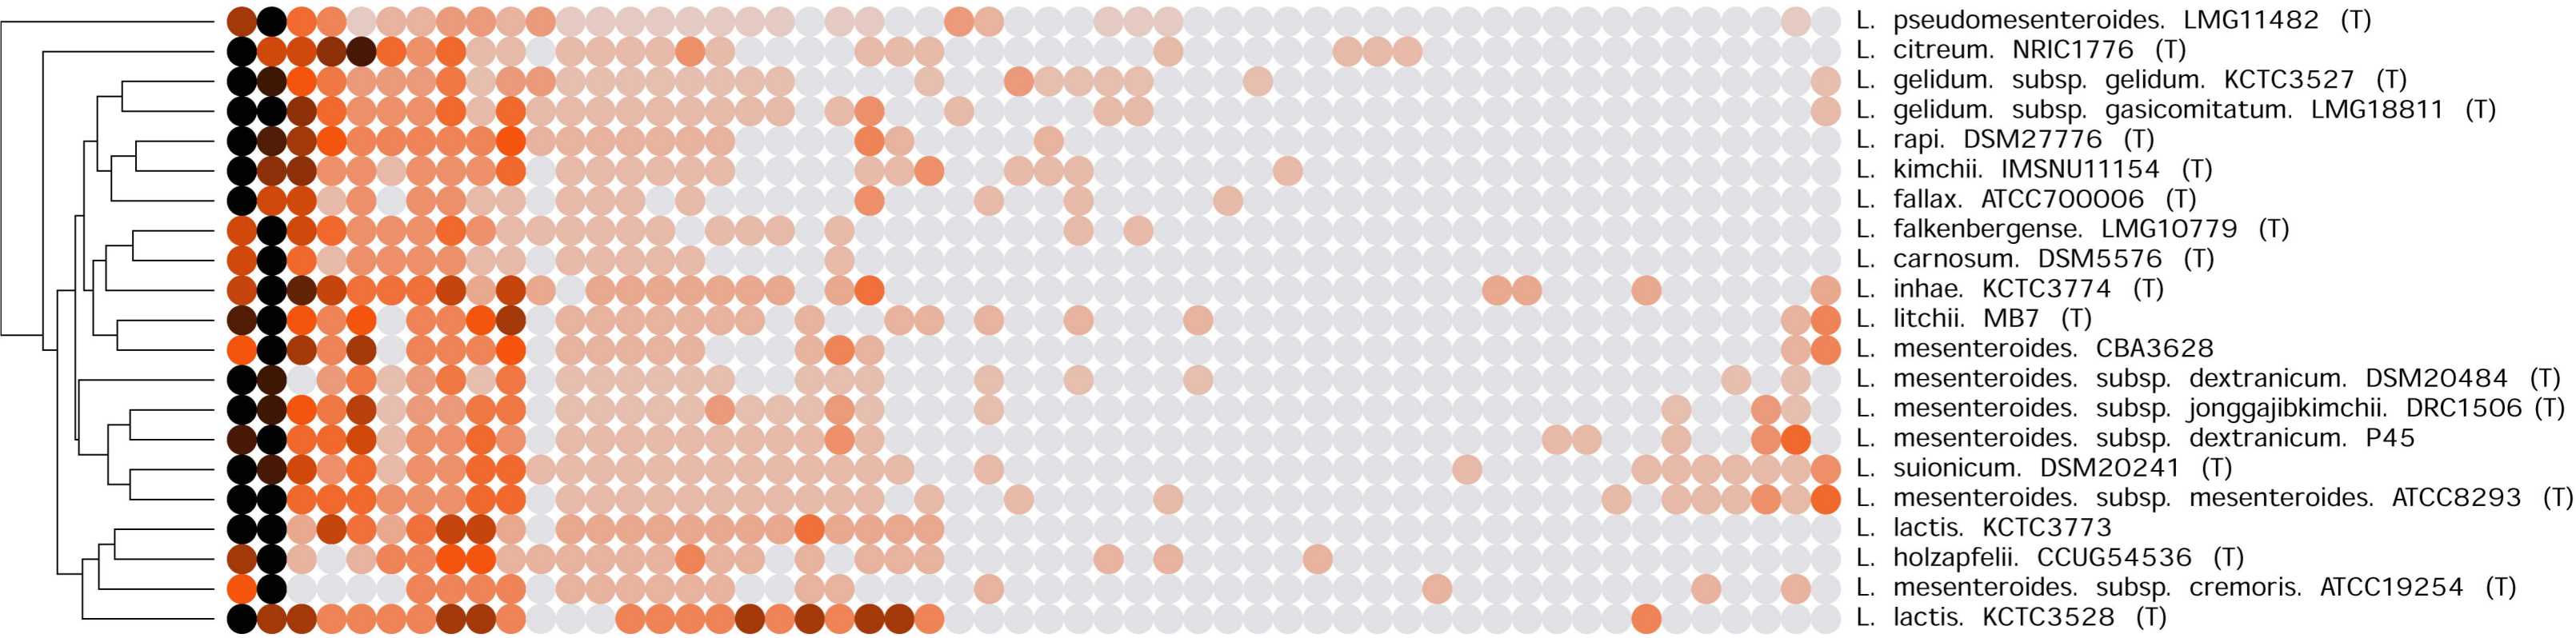

(B)
